# Supplementary material for: Prevalence of long-term health conditions in adults with autism: observational study of a whole country population
Source: PubMed Central journal article supplement — BMJ Open. 2018 Sep 1;8(8):e023945. doi: 10.1136/bmjopen-2018-023945 (PMC6120653; doi:10.1136/bmjopen-2018-023945), 2018-09-01
Supplement: bmjopen-2018-023945.draft_revisions.pdf [file bmjopen-2018-023945.draft_revisions.pdf]

# BMJ Open

BMJ Open is committed to open peer review. As part of this commitment we make the peer review history of every article we publish publicly available.

When an article is published we post the peer reviewers' comments and the authors' responses online. We also post the versions of the paper that were used during peer review. These are the versions that the peer review comments apply to.

The versions of the paper that follow are the versions that were submitted during the peer review process. They are not the versions of record or the final published versions. They should not be cited or distributed as the published version of this manuscript.

BMJ Open is an open access journal and the full, final, typeset and author-corrected version of record of the manuscript is available on our site with no access controls, subscription charges or pay-per-view fees (<http://bmjopen.bmj.com>).

If you have any questions on BMJ Open's open peer review process please email [info.bmjopen@bmj.com](mailto:info.bmjopen@bmj.com)

# BMJ Open

## Prevalence of long-term health conditions in adults with autism - observational study of a whole country population

|                               |                                                                                                                                                                                                                                                                                                                                                                                                                                                                                                                                                                                                                          |
|-------------------------------|--------------------------------------------------------------------------------------------------------------------------------------------------------------------------------------------------------------------------------------------------------------------------------------------------------------------------------------------------------------------------------------------------------------------------------------------------------------------------------------------------------------------------------------------------------------------------------------------------------------------------|
| Journal:                      | <i>BMJ Open</i>                                                                                                                                                                                                                                                                                                                                                                                                                                                                                                                                                                                                          |
| Manuscript ID                 | bmjopen-2018-023945                                                                                                                                                                                                                                                                                                                                                                                                                                                                                                                                                                                                      |
| Article Type:                 | Research                                                                                                                                                                                                                                                                                                                                                                                                                                                                                                                                                                                                                 |
| Date Submitted by the Author: | 02-May-2018                                                                                                                                                                                                                                                                                                                                                                                                                                                                                                                                                                                                              |
| Complete List of Authors:     | Rydzewska, Ewelina; University of Glasgow, Institute of Health and Wellbeing<br>Hughes-McCormack, Laura; University of Glasgow, Institute of Health and Wellbeing<br>Gillberg, Christopher; Goteborgs universitet Naturvetenskapliga Fakulteten, Department of Psychiatry and Neurochemis<br>Henderson, Angela; University of Glasgow, Institute of Health and Wellbeing<br>MacIntyre, Cecilia; National Records of Scotland, Census User Needs, Content and Benefits<br>Rintoul, Julie; Scottish Government, Health & Social Care Analysis<br>Cooper, Sally-Ann; Glasgow University , Institute of Health and Wellbeing |
| Keywords:                     | autism, adults, prevalence, comorbidity, MENTAL HEALTH, physical disabilities                                                                                                                                                                                                                                                                                                                                                                                                                                                                                                                                            |
|                               |                                                                                                                                                                                                                                                                                                                                                                                                                                                                                                                                                                                                                          |

SCHOLARONE™  
Manuscripts

Only

1  
2  
3 **Prevalence of long-term health conditions in adults with autism - observational study**  
4 **of a whole country population**  
5  
6

7 Ewelina Rydzewska, Laura A Hughes-McCormack, Christopher Gillberg, Angela Henderson,  
8 Cecilia MacIntyre, Julie Rintoul, Sally-Ann Cooper  
9

10 Institute of Health and Wellbeing, University of Glasgow, Mental Health and Wellbeing  
11 Group, 1st Floor, Administrative Building, Gartnavel Royal Hospital, 1055 Great Western  
12 Road, Glasgow G12 0XH, UK  
13 Ewelina Rydzewska  
14 Research Associate  
15

16 Institute of Health and Wellbeing, University of Glasgow, Mental Health and Wellbeing  
17 Group, 1st Floor, Administrative Building, Gartnavel Royal Hospital, 1055 Great Western  
18 Road, Glasgow G12 0XH, UK  
19 Laura A Hughes-McCormack  
20 Research Assistant  
21

22 1 Göteborgs Universitet/University of Gothenburg, Gillbergcentrum/Gillberg Neuropsychiatry  
23 Centre, Kungsgatan 12, S-411 19 Göteborg, Sweden  
24 2 Institute of Health and Wellbeing, University of Glasgow, Mental Health and Wellbeing  
25 Group, 1st Floor, Administrative Building, Gartnavel Royal Hospital, 1055 Great Western  
26 Road, Glasgow G12 0XH, UK  
27 Christopher Gillberg  
28 Professor of Child and Adolescent Psychiatry  
29

30 Institute of Health and Wellbeing, University of Glasgow, Mental Health and Wellbeing  
31 Group, 1st Floor, Administrative Building, Gartnavel Royal Hospital, 1055 Great Western  
32 Road, Glasgow G12 0XH, UK  
33 Angela Henderson  
34 Scottish Learning Disabilities Observatory Deputy Director  
35

36 Census User Needs, Content and Benefits, National Records of Scotland, Ladywell House,  
37 Edinburgh EH12 7TF, UK  
38 Cecilia MacIntyre  
39 Statistician  
40

41 Health & Social Care Analysis, Scottish Government, St. Andrew's House, Regent Road,  
42 Edinburgh EH1 3DG, UK  
43 Julie Rintoul  
44 Statistician  
45

46 Institute of Health and Wellbeing, University of Glasgow, Mental Health and Wellbeing  
47 Group, 1st Floor, Administrative Building, Gartnavel Royal Hospital, 1055 Great Western  
48 Road, Glasgow G12 0XH, UK  
49 Sally-Ann Cooper  
50 Professor of Learning Disabilities  
51

52 **Corresponding author:**  
53 Professor Sally-Ann Cooper  
54 Email: [Sally-Ann.Cooper@glasgow.ac.uk](mailto:Sally-Ann.Cooper@glasgow.ac.uk)  
55  
56  
57  
58  
59  
60

**Abstract****Objectives:**

To investigate the prevalence of comorbid mental health conditions and physical disabilities in a whole country population of adults aged 25+ with and without reported autism.

**Design:**

Secondary analysis of Scotland's Census, 2011 data. Cross-sectional study.

**Setting:**

General population.

**Participants:**

94% of Scotland's population, including 6,649/3,746,584 adults aged 25+ reported to have autism.

**Main outcome measures:**

Prevalence of six comorbidities: deafness or partial hearing loss, blindness or partial sight loss, intellectual disabilities, mental health conditions, physical disability, and other condition; odds ratios (OR: 95% confidence intervals) of autism predicting these comorbidities, adjusted for age and gender; and OR for age and gender in predicting comorbidities within the population with reported autism.

**Results:**

Comorbidities were common: deafness/hearing loss - 17.5%; blindness/sight loss - 12.1%; intellectual disabilities - 29.4%; mental health conditions - 33.0%; physical disability - 30.7%; other condition - 34.1%. Autism statistically predicted all of the conditions: OR=3.3 (3.1 to 3.6) for deafness or partial hearing loss, OR=8.5 (7.9 to 9.2) for blindness or partial sight loss, OR=94.6 (89.4 to 100.0) for intellectual disabilities, OR=8.6 (8.2 to 9.0) for mental health conditions, OR=6.2 (5.8 to 6.6) for physical disability, and OR=2.6 (2.5 to 2.8) for other condition. Contrary to findings within the general population, female gender predicted all conditions within the population with reported autism, including intellectual disabilities (OR=1.4).

**Conclusions:**

Clinicians need heightened awareness of comorbidities in adults with autism to improve detection and suitable care, especially given the added complexity of assessment in this population and the fact that hearing and visual impairments may cause additional difficulties with reciprocal communication which are also a feature of autism; hence posing further challenges in assessment.

1  
2  
3 **Keywords:** autism, adults, prevalence, comorbidity, mental health, physical  
4 disabilities, health inequalities  
5

6  
7  
8 **Strengths and limitations of this study:**  
9

- 10
- 11 • Unique study of comorbidity in adults with reported autism in a whole country  
12 population
  - 13 • High response rate of 94%, and systematic enquiry of everyone regarding  
14 autism and comorbidities (deafness, blindness, intellectual disabilities, mental  
15 health condition, physical disability, and other condition)
  - 16 • Results of the study are generalisable to other adult populations in high-  
17 income countries
  - 18 • Findings are limited by the broad survey reporting of comorbidities, rather  
19 than detailed examinations  
20  
21  
22  
23  
24  
25  
26  
27  
28  
29  
30  
31  
32  
33  
34  
35  
36  
37  
38  
39  
40  
41  
42  
43  
44  
45  
46  
47  
48  
49  
50  
51  
52  
53  
54  
55  
56  
57  
58  
59  
60

## Introduction

In the last 20 years, there has been a considerable increase in awareness of autism, but research on the comorbid conditions that adults with autism experience is limited.<sup>1</sup> It has been suggested that some comorbidities are more common in children with autism than in the general population,<sup>2</sup> but little research has been conducted with adults. Given the communicative and other problems that are a prominent feature of autism, the detection and management of comorbid conditions in people with autism is more complex than for other people. Therefore, it is important to know whether or not health problems are more common than in the general population. Empirically founded information about autism comorbidity would help to raise clinicians' awareness, and in turn increase identification and appropriate management.

Mental health has been studied more than physical health in adults with autism. However, systematic reviews reveal wide variation in reported prevalence of mental ill-health between studies. This is partly because almost all studies are based on clinical populations. Therefore, findings cannot be generalised with confidence, and additionally most study samples are small in size, and very few have drawn comparisons with the general population. It has been suggested that depression,<sup>3</sup> bipolar disorder,<sup>4</sup> suicidal thoughts/behaviour,<sup>5</sup> non-affective psychosis,<sup>6</sup> and attention-deficit hyperactivity disorder<sup>7,8</sup> may be more common in adults with autism. A further study in North California, USA, used medical records from a single health delivery provider of inpatient and outpatient medical and mental health services to identify 1,507/1,578,658 (0.1%) adults with autism, who were age and gender matched with controls without recorded autism.<sup>9</sup> The study found that 19.2% of the adults with autism also had a record of intellectual disabilities, and 54% also had a record of one or more mental health conditions; with rates of individual mental conditions being 3-22 times higher for the adults with autism than their controls, and higher in the women with autism than in the men with autism.<sup>9</sup> The study does, however, reflect the sampling frame; only those individuals with an existing record of autism in their medical records were identified as having autism.

1  
2  
3 Blindness/sight loss, deafness/hearing loss, and physical disabilities may be more  
4 common in adults with autism than in other people, but most of the existing literature  
5 is drawn from non-representative and/or small populations, and without general  
6 population comparisons; hence leaving significant doubts as to the actual degree of  
7 overrepresentation. One exception is the North California study of a wide range of  
8 conditions recorded in medical records which found 16 (1.1%) adults with autism to  
9 have low vision or blindness (OR=7.85), and 71 (4.7%) with hearing impairment  
10 (OR=2.35).<sup>9</sup> A further large study across 25 states in USA included 1,002 adults  
11 known to have autism, but was drawn from the population receiving intellectual and  
12 developmental disabilities services; hence it is clearly not representative of the  
13 population of adults with autism.<sup>10</sup> Indeed, only 97 participants (9.7%) did not have  
14 intellectual disabilities, so whilst 9.4% had visual impairments, 5.7% had hearing  
15 impairments, and 6.0% had physical disability, these rates cannot be generalised to  
16 the wider population with autism. In a study of 92/305 adults aged 23-50 who had  
17 been identified to have autism in childhood in the 1980s, 11 of whom were  
18 deceased, participants answered questions on medical conditions and symptoms.<sup>11</sup>  
19 Of the 92, 73% had intellectual disabilities, 12% had hearing impairment, and 25%  
20 visual impairment.<sup>11</sup> Neither of these two studies included a general population  
21 comparison group. We were unable to identify any other studies on these conditions  
22 in adults with autism.  
23  
24  
25  
26  
27  
28  
29  
30  
31  
32  
33  
34  
35

36  
37 This study aimed to investigate the prevalence and predictors of deafness or partial  
38 hearing loss, blindness or partial sight loss, intellectual disabilities, mental health  
39 conditions, physical disability, and other condition, in a whole country population of  
40 adults with reported autism aged 25+ compared with their peers without autism.  
41  
42  
43  
44

## 45 **Methods**

### 46 **Data source**

47  
48 Scotland's Census, 2011, provides information on Scotland's population on the  
49 census date, 27 March 2011. Approval was gained from the Scottish Government for  
50 secondary analysis of the Census data. The Census includes the whole Scottish  
51 population, whether living in communal establishments (such as care homes and  
52 student halls of residence) or private households. Scotland's Census is one of the  
53  
54  
55  
56  
57  
58  
59

1  
2  
3 few country censuses that asks every person in the country whether or not they have  
4 autism, indeed it may be unique in this regard. One householder on behalf of all  
5 occupants in private households, and manager on behalf of all occupants in  
6 communal dwellings, was required to complete the Census information. The Census  
7 team also followed up non-responders and provided help to respond when needed.  
8 The Census form clearly states that it is a legal requirement to complete the form,  
9 and non-completion, or supplying false information attracts a £1,000 fine. The  
10 Census is conducted every 10 years. In 2011, it was estimated to have achieved a  
11 94% response rate.<sup>12</sup> During the original data processing, the Census team adjusted  
12 for the 6% of the total population of Scotland for whom there was not completed  
13 Census data. This used a Census Coverage Survey (including around 40,000  
14 households) to estimate numbers and characteristics. The Coverage Survey and  
15 Census records were matched using automated and clerical matching. All Census  
16 individuals, including individuals reporting long-term health conditions, were  
17 deterministically matched to check if any records were duplicated. Individuals  
18 estimated to have been missed from the Census were then imputed, using a subset  
19 of characteristics from real individuals, including information on their health, to reach  
20 the 100% dataset completeness rate. The process of development of the Scotland's  
21 Census 2011 Edit and Imputation Methodology was adapted from the Office for  
22 National Statistics rigorous and systematic guidelines, which are available here:

23  
24  
25  
26  
27  
28  
29  
30  
31  
32  
33  
34  
35 <http://webarchive.nationalarchives.gov.uk/20160108193745/http://www.ons.gov.uk/ons/guide-method/method-quality/survey-methodology-bulletin/smb-69/index.html>

36 Further details on how the Census population estimates were arrived at are also  
37 available here:

38  
39  
40  
41  
42 <http://www.scotlandscensus.gov.uk/documents/censusresults/release1b/rel1bmethodology.pdf>

43 Full details of the methodology and other background information on Scotland's  
44 Census 2011 are available at:

45  
46  
47  
48 <http://www.scotlandscensus.gov.uk/supporting-information>.

## 49 50 51 **Census variables**

52 Self/proxy-reporting was used to identify people with autism and other long-term  
53 conditions from the Census questionnaire, Question 20: 'Do you have any of the  
54 following conditions which have lasted, or are expected to last, at least 12 months?  
55  
56  
57  
58



1  
2  
3 Tick all that apply'. Respondents were given a choice of 10 response options: (1)  
4 deafness or partial hearing loss, (2) blindness or partial sight loss, (3) learning  
5 disability (for example, Down's syndrome), (4) learning difficulty (for example,  
6 dyslexia), (5) developmental disorder (for example, autistic spectrum disorder or  
7 Asperger's syndrome), (6) physical disability, (7) mental health condition, (8) long-  
8 term illness, disease or condition (9) other condition, (10) no condition. Following  
9 internal requirements for all Scotland's Census 2011 outputs stipulated by the  
10 National Records of Scotland, options 8 (long-term illness, disease or condition) and  
11 9 (other condition) were merged and coded as one category of 'other condition';  
12 thus, this term is used henceforth when referring to both these categories.  
13  
14  
15  
16  
17  
18  
19

20  
21 Importantly, whilst Question 20: 'Do you have any of the following conditions which  
22 have lasted, or are expected to last, at least 12 months?', included the broad term  
23 developmental disorder, it only provided reference to 'autistic spectrum disorder' and  
24 'Asperger's syndrome'. For the purpose of this study we, therefore, interpreted  
25 responses to this question as relating to people who know they have these  
26 conditions, henceforth referred to as autism. Additionally, the question distinguished  
27 autism from learning disability (which in the UK is synonymous to the international  
28 term 'intellectual disabilities'), learning difficulty (which in the UK is synonymous to  
29 the international term 'specific learning disability' such as dyslexia), and mental  
30 health conditions, which are important distinctions.  
31  
32  
33  
34  
35  
36  
37

38  
39 As part of the methodological preparations for Scotland's Census, 2011, the General  
40 Register Office for Scotland commissioned Ipsos MORI Scotland to undertake  
41 cognitive question testing of the question 20 long term health conditions and  
42 disabilities. The aim was primarily to test whether the questions were answered  
43 accurately and willingly by respondents, and what changes might be required to  
44 improve data quality and/or the acceptability of the response options. Cognitive  
45 interviewing is a widely used approach to critically evaluate survey questionnaires.<sup>13</sup>  
46 It enables researchers to modify survey material to enhance clarity. Retrospective  
47 probing was deemed to be the most appropriate of the different techniques for the  
48 Census. The questions were tested with 102 participants with a mix of gender and  
49 age, both with and without the health conditions and disabilities (including people  
50 with more than one of the conditions), to ensure accurate and willing completion, and  
51  
52  
53  
54  
55  
56  
57  
58  
59  
60

1  
2  
3 included people with autism, intellectual disabilities, dyslexia, dyspraxia, speech  
4 impairment, mental health conditions (both milder and more serious), and other long-  
5 term conditions. This resulted in a redesign of the question on autism, to  
6 'Developmental disorder, for example autism spectrum disorder or Asperger's  
7 syndrome' in order to accurately capture specifically the data on autism. The  
8 questions on the other conditions tested (some of which, from a medical perspective,  
9 can be considered as developmental disorders) did not require any modification.  
10  
11 Further information can be found at:  
12  
13

14  
15  
16 [http://www.scotlandscensus.gov.uk/documents/research/2011-census-health-  
18 disability-questions.pdf](http://www.scotlandscensus.gov.uk/documents/research/2011-census-health-<br/>17 disability-questions.pdf)

19 [http://www.scotlandscensus.gov.uk/documents/legislation/changes-to-gov-  
21 statement-report.pdf](http://www.scotlandscensus.gov.uk/documents/legislation/changes-to-gov-<br/>20 statement-report.pdf)  
22  
23

## 24 **Data Analysis**

25 We calculated the numbers and percentages of people with and without reported  
26 autism reporting deafness or partial hearing loss, blindness or partial sight loss,  
27 intellectual disabilities, mental health conditions, physical disability, and other  
28 condition. We compared differences between the populations with and without  
29 reported autism using chi-square tests. Within the whole population, we then used  
30 six binary logistic regressions to calculate odds ratios (OR: 95% confidence  
31 intervals) of autism predicting having each of the six types of additional health  
32 conditions, adjusted for age group and gender. We then calculated the ORs for age  
33 group and gender in predicting each of the six comorbidities within the population  
34 with reported autism. All analyses were conducted with SPSS software version 22.  
35  
36  
37  
38  
39  
40  
41  
42

## 43 **Patient and Public Involvement**

44 The question on autism was included in Scotland's Census, 2011 at the behest of  
45 third sector organisations for people with autism. This study was undertaken by the  
46 Scottish Learning Disabilities Observatory, which has a specific remit for people with  
47 autism; its steering group includes partners from the third sector organisations.  
48 Results from this study will be disseminated for people with autism in easy-read  
49 version via the Scottish Learning Disabilities Observatory website and newsletters.  
50  
51  
52  
53  
54  
55  
56  
57  
58  
59  
60

## Results

### Participant characteristics

Scotland's Census 2011 included records on 5,295,403 people. There were 6,649/3,746,584 (0.2%) adults aged 25+ recorded to have autism as defined here, 4,610 (69.3%) of whom were men and 2,039 (30.7%) women compared with 1,776,845 (47.5%) men and 1,963,090 (52.5%) women in the adult population without autism (Table 1).

- Insert Table 1 here -

### Prevalence of reported comorbidities

The adult population with reported autism was significantly more likely to have each of the additional health conditions when compared to the population without reported autism, with each at the  $p < 0.001$  level (Table 2).

- Insert Table 2 here -

Table 3 shows the OR (95% Confidence intervals) of autism predicting each of the six conditions: OR=3.3 (3.1-3.6) for deafness or partial hearing loss, OR=8.5 (7.9-9.2) for blindness or partial sight loss, OR=94.6 (89.4-100.0) for intellectual disabilities, OR=8.6 (8.2-9.0) for mental health conditions, OR=6.2 (5.8-6.6) for physical disability, and OR=2.6 (2.5-2.8) for other condition. Table 4 shows the OR (95% Confidence interval) of age and gender in predicting comorbidities within the population with autism aged 25+. As one would expect, in the whole population, older age group statistically predicted blindness, deafness, physical disability and other condition, whilst age over 55 reduced the likelihood of intellectual disabilities (presumably due to early death), as did the 65+ age group for mental health conditions. Female gender predicted blindness, mental health conditions, physical disability and other condition, whilst male gender predicted deafness and intellectual disabilities. Within the population with reported autism, older age group also statistically predicted blindness, deafness, physical disability and other condition, but

1  
2  
3 not intellectual disabilities and mental health conditions. Contrary to findings in the  
4 general population, female gender predicted all conditions within the population with  
5 reported autism.  
6  
7

8  
9 - Insert Tables 3 and 4 here –  
10

## 11 **Discussion**

### 12 **Principal findings and comparison with existing literature**

13  
14  
15  
16 Comorbidity is substantially greater in adults with reported autism than in other  
17 people; with odds ratios of 95 for intellectual disabilities, 9 for mental health  
18 conditions, 9 for deafness or partial hearing loss, 6 for physical disability, 3 for  
19 blindness or partial sight loss, and 3 for other condition. All these conditions were  
20 common in adults with reported autism. These findings are important given the gap  
21 in evidence, as clinicians need to have heightened awareness of potential  
22 comorbidities in order to provide suitable investigation and management to maximise  
23 functioning and therefore improve quality of life. Findings on hearing and visual  
24 impairments for people with reported autism are perhaps particularly important, given  
25 the impact of these impairments on reciprocal communication, which is also an  
26 integral underlying impairment in autism. Clinical assessments of people with autism  
27 are more complex and take longer than for the average person. Nevertheless, our  
28 findings have demonstrated that investment in such assessments is necessary and  
29 important given the much higher prevalence of comorbidities.  
30  
31  
32  
33  
34  
35  
36  
37  
38  
39  
40  
41

42 We found mental health conditions in 33% of all adults with reported autism (range  
43 23-37% depending on age group; 27%-37% for men and 30%-40% for women). This  
44 high rate is lower than a previous report of 54%<sup>9</sup>, but their sample may have been  
45 biased to a more severely affected/complex population given their sampling, as  
46 shown by their lower identification rate for autism. We found 14% with hearing  
47 impairment (range 7%-46% depending on age group; 5%-44% for men and 11%-  
48 47% for women), and 12% with visual impairments (range 7%-30% depending on  
49 age group; 7%-27% for men and 10%-35% for women), notably higher than the rates  
50 recorded in medical records reported in the North California study (4.7% and 1.1%  
51  
52  
53  
54  
55  
56  
57  
58  
59  
60

1  
2  
3 respectively, though ORs were not dissimilar)<sup>9</sup> likely reflecting the different study  
4 methodologies. In the study of 92 adults with autism, 12% had hearing impairment,  
5 and 25% visual impairment,<sup>11</sup> respectively, though the study was much smaller and  
6 of limited age range than in our study. A high rate of intellectual disabilities in  
7 children with autism has been described previously; we have now quantified the  
8 extent of this - 29% (25%-32% depending on age group; 22%-35% for men and  
9 31%-42% for women) - in a much larger study of adults. There are few other studies  
10 with which we can draw comparisons, and we identified none on physical disability in  
11 adults with autism with which we could compare the high rate of 24% for all adults  
12 aged 25+ (range 15%-45% depending on age group; 14%-42% for men and 24%-  
13 45% for women).

14  
15  
16 A view has been expressed that autism is currently underdiagnosed in more  
17 intellectually-able females compared with males.<sup>14</sup> We found that 34% of women  
18 compared with only 27% of men with autism reported accompanying intellectual  
19 disabilities, so the female population with autism was intellectually less able than the  
20 male population with autism. Our findings may therefore provide some evidence to  
21 support the view of under-diagnosis of autism in the more intellectually-able women.  
22 Alternatively, women and men with autism may actually be intellectually different.

23  
24  
25 We have previously reported Census findings on comorbidities for people with  
26 intellectual disabilities.<sup>15</sup> Many conditions are related to intellectual level, with there  
27 being a gradient across the whole spread of intelligence (not just intellectual  
28 disabilities).<sup>16</sup> Given the lower average intelligence we found in the autistic women  
29 than the autistic men, one might expect more comorbidities to be found in the  
30 women than the men. Indeed, the women with autism had higher rates of all six  
31 comorbidities than did the men with autism; odds ratio of female gender predicting  
32 each of the six comorbidities was greater for all conditions (except mental health) in  
33 the population with autism compared with the whole population, and indeed reversed  
34 for deafness and intellectual disabilities which were more common in men in the  
35 whole population. Alternatively, these findings could support the view that in some  
36 cases it is the concept of 'Autism Plus' (i.e. autism co-occurring with any other major  
37 neurodevelopmental disorder),<sup>17</sup> which ultimately results in people receiving a  
38 diagnosis of autism. Whilst this Plus element of co-occurring conditions is currently  
39  
40  
41  
42  
43  
44  
45  
46  
47  
48  
49  
50  
51  
52  
53  
54  
55  
56  
57  
58  
59  
60

1  
2  
3 often neglected in assessment, diagnosis and intervention, in some populations,  
4 possibly including women, it may be the initial or primary reason for considering a  
5 diagnosis of autism.  
6  
7  
8  
9

### 10 **Strengths and limitations**

11 We believe this study to be unique in including the whole population of a country,  
12 with a high response rate, and systematic enquiry of everyone regarding autism and  
13 selected long-term conditions. The results of this study are generalisable to other  
14 adult populations in high-income countries. The concept of autistic spectrum disorder  
15 has broadened in recent years; hence our findings relate to the narrower definition  
16 that was used to diagnose autism in the past, as the study is one of adults who most  
17 likely were originally diagnosed in childhood. This accounts for the 0.2% identified  
18 prevalence; more recent studies conducting autism assessments have reported  
19 higher prevalence.<sup>18</sup> Limitations may include the use of the term developmental  
20 disorders in the Census, although the clarification of this term provided on the  
21 Census form included only autistic spectrum disorder and Asperger's syndrome, and  
22 the phrasing of the question was carefully selected specifically to capture autism,  
23 from results of the cognitive question testing procedure. Furthermore, this category  
24 was distinguished from intellectual disabilities, specific learning disability, and mental  
25 health conditions, and tested with people with all these conditions. Hence, we  
26 consider that respondents will have replied accordingly, i.e. responded regarding  
27 autism. However, we have no further means to check this on the whole population.  
28 Respondents reported whether or not each person was known to have autism rather  
29 than each person having an assessment for autism, so some reporting error is  
30 possible. The Census form was also broad-brush in its questioning rather than  
31 including detailed sub-questions on each of the six categories of health conditions.  
32 Finally, whilst we describe the imputation process, we cannot state with certainty  
33 whether or not the imputed 6% of records contained the same, more or fewer  
34 proportion of adults with autism, but note that this missing 6% is a small proportion  
35 overall. Despite this, we believe the results of this study are generalisable to other  
36 high-income countries, as well as filling a significant gap in existing research on the  
37 prevalence of long-term health conditions in adults with autism.  
38  
39  
40  
41  
42  
43  
44  
45  
46  
47  
48  
49  
50  
51  
52  
53  
54  
55  
56  
57  
58  
59  
60

### **Implications for clinicians**

This study advances our knowledge of comorbidities in adults with autism, which is otherwise somewhat invisible in previous studies. Adults with reported autism have very high rates of comorbid physical disabilities as well as mental health conditions. Hearing and visual impairments are also very common, and their impact on reciprocal communication, especially if undiagnosed/unattended, may compound core features of autism. Clinicians require a heightened awareness of this, especially given the greater complexity of health assessments in adults with autism compared with other people. It is essential to have accurate information on the prevalence of comorbid conditions in adults with autism in order to accurately plan for service provision and to tackle health inequalities. Our study is large scale and robust in design, but requires replication given the relative lack of previous study on this topic.

**Word count: 3,153**

### **Acknowledgements:**

We would like to thank the Scottish Government for funding and supporting this project. In particular, we would like to thank the National Records of Scotland for assisting with the data analysis and dissemination stages of the project.

### **Contributors:**

ER analysed the data, jointly interpreted it, and wrote the first draft of the manuscript, LAH-M, CG, and AH jointly interpreted the data, and contributed to the manuscript, CM and JR worked on the Census, jointly interpreted the data, and contributed to the manuscript, S-AC conceived the project, interpreted the data, and contributed to the manuscript. All authors approved the final version of the manuscript. S-AC is the study guarantor.

S-AC confirms the manuscript is an honest, accurate and transparent account of the study being reported, that no important aspects of the study have been omitted, and there has been no discrepancies from the study as planned.

### **Funding:**

This work was supported by the Scottish Government via the xxx. The funder had no role in the study design, collection, analyses and interpretation of data, in writing the report, nor in the decision to submit the article for publication.



**Competing interests:**

All authors have completed the Unified Competing Interest form (available on request from the corresponding author) at [www.icmje.org/coi\\_disclosure.pdf](http://www.icmje.org/coi_disclosure.pdf) and declare: all authors had financial support from the Scottish Government for the submitted work; no financial relationships with any organisations that might have an interest in the submitted work in the previous three years; no other relationships or activities that could appear to have influenced the submitted work.

**Patient consent:**

Not applicable

**Ethical approval:**

Permission to access data was granted by the Scottish Government.

**Provenance and peer review:**

Not commissioned; externally peer reviewed.

**Data sharing statement:**

Data available at:

<http://www.scotlandscensus.gov.uk/ods-web/data-warehouse.html#additionaltab>

**References:**

1. Perkins EA, Berkman KA. Into the unknown: aging with autism spectrum disorders. *Am J Int and Dev Dis* 2012;117:478-496.
2. Gillberg C, Billstedt E. Autism and Asperger syndrome: coexistence with other clinical disorders. *Acta Psychiatr Scand* 2000;102:321-330.
3. Stewart ME, Barnard L, Pearson J, *et al*. Presentation of depression in autism and Asperger syndrome. *Autism* 2006;10:103-116.
4. Vannucchi G, Masi G, Toni C, *et al*. Bipolar disorder in adults with Asperger's syndrome: a systematic review. *J Affect Disord* 2014;168:151-160.
5. Segers M, Rawana J. What do we know about suicidality in autism spectrum disorders? A systematic review. *Autism Research* 2014;7:507-521.
6. Padgett FE, Miltsiou E, Tiffin PA. The co-occurrence of nonaffective psychosis and the pervasive developmental disorders: a systematic review. *J Intellect Dev Disabil* 2010;35:187-198.
7. Johnston K, Dittner A, Bramham J, *et al*. Attention deficit hyperactivity disorder symptoms in adults with autism spectrum disorders, *Autism Research* 2013;6:225-236.
8. Gillberg IC, Helles A, Billstedt E, *et al*. Boys with Asperger Syndrome Grow Up: Psychiatric and Neurodevelopmental Disorders 20 Years After Initial Diagnosis, *J Autism Dev Disord* 2016;46:74-82.



- 1
- 2
- 3 9. Croen LA, Zerbo O, Qian Y, *et al*. The health status of adults on the autism
- 4 spectrum. *Autism* 2015;19:814–823.
- 5
- 6 10. Hewitt AS, Stancliffe RJ, Johnson Sirek A, *et al*. Characteristics of adults with
- 7 autism spectrum disorder who use adult developmental disability services:
- 8 Results from 25 US states. *Res Autism Spectr Disord* 2012;6:741–751.
- 9
- 10 11. Jones KB, Kottle K, Bakian A, *et al*. A description of medical conditions in
- 11 adults with autism spectrum disorder: a follow-up of the 1980s Utah/UCLA
- 12 Autism Epidemiologic Study. *Autism* 2016;20:551–561.
- 13
- 14 12. National Records of Scotland (NRS). *2011 Census Release 1C - How the*
- 15 *2011 Census population estimates were obtained*. Edinburgh: National
- 16 Records of Scotland 2013.
- 17
- 18 13. Wills GB. *Cognitive Interviewing. A tool for improving questionnaire design*.
- 19 Sage Publications. Thousand Oaks, 2005.
- 20
- 21 14. Dworzynski K, Ronald A, Bolton P, *et al*. How different are girls and boys
- 22 above and below the diagnostic threshold for autism spectrum disorders? *J*
- 23 *Am Acad Child Adolesc Psychiatry* 2012;51:788–797.
- 24
- 25 15. Hughes-McCormack LA, Rydzewska E, Henderson A, *et al*. Prevalence of
- 26 mental ill-health and relationship with physical health in a whole country
- 27 population of 26,349 people with intellectual disabilities, compared with the
- 28 general population. *British Journal of Psychiatry Open* 2017;3(5):
- 29 <http://bjpo.rcpsych.org/content/3/5/243>
- 30
- 31 16. Wraw C, Deary IJ, Gale CR, *et al*. Intelligence in youth and health at age 50.
- 32 *Intelligence* 2015;53:23-32.
- 33
- 34 17. Gillberg C, Fernell E, Autism Plus Versus Autism Pure. *J Autism Dev Disord*
- 35 2014;44:3274-3276.
- 36
- 37 18. Brugha TS, Spiers N, Bankart J, *et al*. Epidemiology of autism in adults across
- 38 age groups and ability levels. *Br J Psychiatry* 2016;209:498-503.
- 39
- 40
- 41
- 42
- 43
- 44
- 45
- 46
- 47
- 48
- 49
- 50
- 51
- 52
- 53
- 54
- 55
- 56
- 57
- 58
- 59
- 60

**Table 1. Number and proportion of adults with autism by age and gender**

| Age                        | Gender                       | Autism       | Without autism    |
|----------------------------|------------------------------|--------------|-------------------|
| <b>All adults aged 25+</b> | Male<br>N=1,781,455 (100%)   | 4,610 (0.3%) | 1,776,845 (99.7%) |
|                            | Female<br>N=1,965,129 (100%) | 2,039 (0.1%) | 1,963,090 (99.9%) |
|                            | All<br>N=3,746,584 (100%)    | 6,649 (0.2%) | 3,739,935 (99.8%) |
| <b>25-34 y</b>             | Male<br>N= 328,607 (100%)    | 1,753 (0.5%) | 326,854 (99.5%)   |
|                            | Female<br>N= 338,720 (100%)  | 636 (0.2%)   | 338,084 (99.8%)   |
|                            | All<br>N= 632,488 (100%)     | 2,389 (0.4%) | 664,938 (99.6%)   |
| <b>35-44 y</b>             | Male<br>N= 357,670 (100%)    | 1,117 (0.3%) | 356,553 (99.7%)   |
|                            | Female<br>N= 377,084 (100%)  | 471 (0.1%)   | 376,613 (99.9%)   |
|                            | All<br>N= 734,754 (100%)     | 1,588 (0.2%) | 733,166 (99.8%)   |
| <b>45-54 y</b>             | Male<br>N= 384,517 (100%)    | 890 (0.2%)   | 383,627 (99.8%)   |
|                            | Female<br>N= 402,239 (100%)  | 377 (0.1%)   | 401,862 (99.9%)   |
|                            | All<br>N=786,756 (100%)      | 1,267 (0.2%) | 785,489 (99.8%)   |
| <b>55-64 y</b>             | Male<br>N= 326,922 (100%)    | 474 (0.1%)   | 326,448 (99.9%)   |
|                            | Female<br>N= 340,491 (100%)  | 233 (0.1%)   | 340,258 (99.9%)   |
|                            | All<br>N=667,413 (100%)      | 707 (0.1%)   | 666,706 (99.9%)   |
| <b>65+ y</b>               | Male<br>N= 383,739 (100%)    | 376 (0.1%)   | 383,363 (99.9%)   |
|                            | Female<br>N= 506,595 (100%)  | 322 (0.1%)   | 506,273 (99.9%)   |
|                            | All<br>N=890,334 (100%)      | 698 (0.1%)   | 889,636 (99.9%)   |

**Table 2. Prevalence of comorbidities in adults with and without autism by age and gender**

| Age group           | Condition                     | Autism                   |                            |                            | Without autism               |                                |                                |
|---------------------|-------------------------------|--------------------------|----------------------------|----------------------------|------------------------------|--------------------------------|--------------------------------|
|                     |                               | Men<br>N=4,610<br>(100%) | Women<br>N=2,039<br>(100%) | Total<br>N=6,649<br>(100%) | Men<br>N=1,776,845<br>(100%) | Women<br>N=1,963,090<br>(100%) | Total<br>N=3,739,935<br>(100%) |
| All adults aged 25+ | Deafness/partial hearing loss | 583 (12.6%)              | 356 (17.5%)                | 939 (14.1%)                | 178,994 (10.1%)              | 160,495 (8.2%)                 | 339,489 (9.1%)                 |
|                     | Blindness/partial sight loss  | 503 (10.9%)              | 304 (14.9%)                | 807 (12.1%)                | 52,351 (2.9%)                | 65,198 (3.3%)                  | 117,549 (3.1%)                 |
|                     | Intellectual disabilities     | 1,254 (27.2%)            | 699 (34.3%)                | 1,953 (29.4%)              | 8,141 (0.5%)                 | 6,859 (0.3%)                   | 15,000 (0.4%)                  |
|                     | Mental health condition       | 1,468 (31.8%)            | 728 (35.7%)                | 2,196 (33.0%)              | 90,292 (5.1%)                | 121,584 (6.2%)                 | 211,876 (5.7%)                 |
|                     | Physical disability           | 973 (21.1%)              | 626 (30.7%)                | 1,599 (24.0%)              | 150,896 (8.5%)               | 188,347 (9.6%)                 | 339,243 (9.1%)                 |
|                     | Other condition               | 1,402 (30.4%)            | 864 (42.4%)                | 2,266 (34.1%)              | 407,090 (22.9%)              | 489,875 (25.0%)                | 896,965 (24.0%)                |
|                     | 25-34 y                       |                          | Men<br>N=1,753<br>(100%)   | Women<br>N=636<br>(100%)   | Total<br>N=2,389<br>(100%)   | Men<br>N=326,854<br>(100%)     | Women<br>N=338,084<br>(100%)   |
|                     | Deafness/partial hearing loss | 94 (5.4%)                | 68 (10.7%)                 | 162 (6.8%)                 | 4,341 (1.3%)                 | 3,651 (1.1%)                   | 7,992 (1.2%)                   |
|                     | Blindness/partial sight loss  | 118 (6.7%)               | 62 (9.7%)                  | 180 (7.5%)                 | 2,382 (0.7%)                 | 1,698 (0.5%)                   | 4,080 (0.6%)                   |
|                     | Intellectual disabilities     | 391 (22.3%)              | 211 (33.2%)                | 602 (25.2%)                | 1,634 (0.5%)                 | 1,239 (0.4%)                   | 2,873 (0.4%)                   |

|                |                                      |                                   |                                   |                                     |                                     |                                       |                                       |
|----------------|--------------------------------------|-----------------------------------|-----------------------------------|-------------------------------------|-------------------------------------|---------------------------------------|---------------------------------------|
|                | <b>Mental health condition</b>       | 466 (26.6%)                       | 188 (29.6%)                       | 654 (27.4%)                         | 13,522 (4.1%)                       | 19,428 (5.7%)                         | 32,950 (5.0%)                         |
|                | <b>Physical disability</b>           | 253 (14.4%)                       | 163 (25.6%)                       | 416 (17.4%)                         | 5,616 (1.7%)                        | 5,200 (1.5%)                          | 10,816 (1.6%)                         |
|                | <b>Other condition</b>               | 420 (24.0%)                       | 218 (34.3%)                       | 638 (26.7%)                         | 23,726 (7.3%)                       | 31,470 (9.3%)                         | 55,196 (8.3%)                         |
| <b>35-44 y</b> |                                      | <b>Men<br/>N=1,117<br/>(100%)</b> | <b>Women<br/>N=471<br/>(100%)</b> | <b>Total<br/>N=1,588<br/>(100%)</b> | <b>Men<br/>N=356,553<br/>(100%)</b> | <b>Women<br/>N=376,613<br/>(100%)</b> | <b>Total<br/>N=733,166<br/>(100%)</b> |
|                | <b>Deafness/partial hearing loss</b> | 83 (7.4%)                         | 44 (9.3%)                         | 127 (8.0%)                          | 8,442 (2.4%)                        | 7,067 (1.9%)                          | 15,509 (2.1%)                         |
|                | <b>Blindness/partial sight loss</b>  | 94 (8.4%)                         | 46 (9.8%)                         | 140 (8.8%)                          | 3,664 (1.0%)                        | 2,498 (0.7%)                          | 6,162 (0.8%)                          |
|                | <b>Intellectual disabilities</b>     | 304 (27.2%)                       | 146 (31.0%)                       | 450 (28.3%)                         | 1,905 (0.5%)                        | 1,504 (0.4%)                          | 3,409 (0.5%)                          |
|                | <b>Mental health condition</b>       | 377 (33.8%)                       | 187 (39.7%)                       | 564 (35.5%)                         | 22,156 (6.2%)                       | 27,844 (7.4%)                         | 50,000 (6.8%)                         |
|                | <b>Physical disability</b>           | 216 (19.3%)                       | 112 (23.8%)                       | 328 (20.7%)                         | 12,711 (3.6%)                       | 12,727 (3.4%)                         | 25,438 (3.5%)                         |
|                | <b>Other condition</b>               | 318 (28.5%)                       | 190 (40.3%)                       | 508 (32.0%)                         | 43,670 (12.2%)                      | 54,825 (14.6%)                        | 98,495 (13.4%)                        |
| <b>45-54 y</b> |                                      | <b>Men<br/>N=890<br/>(100%)</b>   | <b>Women<br/>N=377<br/>(100%)</b> | <b>Total<br/>N=1,267<br/>(100%)</b> | <b>Men<br/>N=383,627<br/>(100%)</b> | <b>Women<br/>N=401,862<br/>(100%)</b> | <b>Total<br/>N=785,489<br/>(100%)</b> |
|                | <b>Deafness/partial hearing loss</b> | 116 (13.0%)                       | 58 (15.4%)                        | 174 (13.7%)                         | 19,115 (5.0%)                       | 13,565 (3.4%)                         | 32,680 (4.2%)                         |
|                | <b>Blindness/partial sight loss</b>  | 113 (12.7%)                       | 46 (12.2%)                        | 159 (12.5%)                         | 6,753 (1.8%)                        | 4,554 (1.1%)                          | 11,307 (1.4%)                         |

|                |                                      |                                 |                                   |                                   |                                     |                                       |                                       |
|----------------|--------------------------------------|---------------------------------|-----------------------------------|-----------------------------------|-------------------------------------|---------------------------------------|---------------------------------------|
|                | <b>Intellectual disabilities</b>     | 268 (30.1%)                     | 133 (35.3%)                       | 401 (31.6%)                       | 2,188 (0.6%)                        | 1,712 (0.4%)                          | 3,900 (0.5%)                          |
|                | <b>Mental health condition</b>       | 316 (35.5%)                     | 140 (37.1%)                       | 456 (36.0%)                       | 23,060 (6.0%)                       | 29,734 (7.4%)                         | 52,794 (6.7%)                         |
|                | <b>Physical disability</b>           | 195 (21.9%)                     | 110 (29.2%)                       | 305 (24.1%)                       | 22,783 (5.9%)                       | 24,340 (6.1%)                         | 47,123 (6.0%)                         |
|                | <b>Other condition</b>               | 283 (31.8%)                     | 152 (40.3%)                       | 435 (34.3%)                       | 74,773 (19.5%)                      | 86,373 (21.5%)                        | 161,146 (20.5%)                       |
| <b>55-64 y</b> |                                      | <b>Men<br/>N=474<br/>(100%)</b> | <b>Women<br/>N=233<br/>(100%)</b> | <b>Total<br/>N=707<br/>(100%)</b> | <b>Men<br/>N=326,448<br/>(100%)</b> | <b>Women<br/>N=340,258<br/>(100%)</b> | <b>Total<br/>N=666,706<br/>(100%)</b> |
|                | <b>Deafness/partial hearing loss</b> | 123 (25.9%)                     | 35 (15.0%)                        | 158 (6.7%)                        | 35,743 (10.9%)                      | 21,889 (6.4%)                         | 57,632 (3.4%)                         |
|                | <b>Blindness/partial sight loss</b>  | 77 (16.2%)                      | 39 (16.7%)                        | 116 (6.5%)                        | 9,193 (2.8%)                        | 6,640 (2.0%)                          | 15,833 (1.2%)                         |
|                | <b>Intellectual disabilities</b>     | 158 (33.3%)                     | 98 (42.1%)                        | 256 (22.7%)                       | 1,381 (0.4%)                        | 1,226 (0.4%)                          | 2,607 (0.4%)                          |
|                | <b>Mental health condition</b>       | 175 (36.9%)                     | 87 (37.3%)                        | 262 (22.9%)                       | 16,848 (5.2%)                       | 18,483 (5.4%)                         | 35,331 (5.3%)                         |
|                | <b>Physical disability</b>           | 150 (31.6%)                     | 85 (36.5%)                        | 235 (15.1%)                       | 36,100 (11.1%)                      | 37,034 (10.9%)                        | 73,134 (4.7%)                         |
|                | <b>Other condition</b>               | 199 (42.0%)                     | 114 (48.9%)                       | 313 (24.6%)                       | 106,897 (32.7%)                     | 109,001 (32.0%)                       | 215,898 (16.4%)                       |
| <b>65+ y</b>   |                                      | <b>Men<br/>N=376<br/>(100%)</b> | <b>Women<br/>N=322<br/>(100%)</b> | <b>Total<br/>N=698<br/>(100%)</b> | <b>Men<br/>N=383,363<br/>(100%)</b> | <b>Women<br/>N=506,273<br/>(100%)</b> | <b>Total<br/>N=889,636<br/>(100%)</b> |
|                | <b>Deafness/partial hearing loss</b> | 167 (44.4%)                     | 151 (46.9%)                       | 318 (45.6%)                       | 111,353 (29.0%)                     | 114,323 (22.6%)                       | 225,676 (25.4%)                       |

|  |                                     |             |             |             |                 |                 |                 |
|--|-------------------------------------|-------------|-------------|-------------|-----------------|-----------------|-----------------|
|  | <b>Blindness/partial sight loss</b> | 101 (26.9%) | 111 (34.5%) | 212 (30.4%) | 30,359 (7.9%)   | 49,808 (9.8%)   | 80,167 (9.0%)   |
|  | <b>Intellectual disabilities</b>    | 133 (35.4%) | 111 (34.5%) | 244 (35.0%) | 1,033 (0.3%)    | 1,178 (0.2%)    | 2,211 (0.2%)    |
|  | <b>Mental health condition</b>      | 134 (35.6%) | 126 (39.1%) | 260 (37.2%) | 14,706 (3.8%)   | 26,095 (5.2%)   | 40,801 (4.6%)   |
|  | <b>Physical disability</b>          | 159 (42.3%) | 156 (48.4%) | 315 (45.1%) | 73,686 (19.2%)  | 109,046 (21.5%) | 182,732 (20.5%) |
|  | <b>Other condition</b>              | 182 (48.4%) | 190 (59.0%) | 372 (53.3%) | 158,024 (41.2%) | 208,206 (41.1%) | 366,230 (41.2%) |

**Table 3. Results of six regressions showing independent predictors of comorbid conditions in the whole adult population**

| Condition                               | Variable |                       | Odds ratio  | 95% confidence interval |
|-----------------------------------------|----------|-----------------------|-------------|-------------------------|
| <b>Deafness or partial hearing loss</b> | Autism   | No autism (reference) | -           |                         |
|                                         |          | Autism                | 3.320       | 3.075-3.585             |
|                                         | Age      | 25-34 (reference)     | -           |                         |
|                                         |          | 35-44                 | 1.768       | 1.721-1.817             |
|                                         |          | 45-54                 | 3.550       | 3.464-3.638             |
|                                         |          | 55-64                 | 7.742       | 7.563-7.926             |
|                                         |          | 65+                   | 28.621      | 27.987-29.269           |
|                                         | Gender   | Male (reference)      | -           |                         |
| Female                                  |          | .683                  | .678-.688   |                         |
| Constant                                |          | .015                  |             |                         |
| <b>Blindness or partial sight loss</b>  | Autism   | No autism (reference) | -           |                         |
|                                         |          | Autism                | 8.514       | 7.861-9.220             |
|                                         | Age      | 25-34 (reference)     | -           |                         |
|                                         |          | 35-44                 | 1.360       | 1.308-1.414             |
|                                         |          | 45-54                 | 2.335       | 2.254-2.419             |
|                                         |          | 55-64                 | 3.882       | 3.752-4.016             |
|                                         |          | 65+                   | 15.769      | 15.287-16.267           |
|                                         | Gender   | Male (reference)      | -           |                         |
| Female                                  |          | 1.018                 | 1.006-1.030 |                         |
| Constant                                |          | .006                  |             |                         |
| <b>Intellectual disabilities</b>        | Autism   | No autism (reference) | -           |                         |
|                                         |          | Autism                | 94.571      | 89.409-100.032          |
|                                         | Age      | 25-34 (reference)     | -           |                         |
|                                         |          | 35-44                 | 1.101       | 1.050-1.154             |
|                                         |          | 45-54                 | 1.187       | 1.134-1.243             |
|                                         |          | 55-64*                | .958        | .910-1.008              |
|                                         |          | 65+                   | .631        | .598-.665               |
|                                         | Gender   | Male (reference)      | -           |                         |
| Female                                  |          | .812                  | .788-.838   |                         |
| Constant                                |          | .005                  |             |                         |
| <b>Mental health condition</b>          | Autism   | No autism (reference) | -           |                         |
|                                         |          | Autism                | 8.595       | 8.163-9.050             |
|                                         | Age      | 25-34 (reference)     | -           |                         |
|                                         |          | 35-44                 | 1.404       | 1.384-1.424             |
|                                         |          | 45-54                 | 1.383       | 1.364-1.403             |
|                                         |          | 55-64                 | 1.076       | 1.060-1.093             |
| 65+                                     | .913     | .899-.926             |             |                         |

|                            |          |                       |        |               |
|----------------------------|----------|-----------------------|--------|---------------|
|                            | Gender   | Male (reference)      | -      |               |
|                            |          | Female                | 1.247  | 1.236-1.258   |
|                            | Constant |                       | .046   |               |
| <b>Physical disability</b> | Autism   | No autism (reference) | -      |               |
|                            |          | Autism                | 6.210  | 5.841-6.603   |
|                            | Age      | 25-34 (reference)     | -      |               |
|                            |          | 35-44                 | 2.138  | 2.091-2.186   |
|                            |          | 45-54                 | 3.786  | 3.708-3.866   |
|                            |          | 55-64                 | 7.311  | 7.164-7.460   |
|                            |          | 65+                   | 15.288 | 14.994-15.587 |
|                            | Gender   | Male (reference)      | -      |               |
|                            |          | Female                | 1.064  | 1.056-1.072   |
|                            | Constant |                       | .016   |               |
| <b>Other condition</b>     | Autism   | No autism (reference) | -      |               |
|                            |          | Autism                | 2.640  | 2.502-2.786   |
|                            | Age      | 25-34 (reference)     | -      |               |
|                            |          | 35-44                 | 1.709  | 1.690-1.728   |
|                            |          | 45-54                 | 2.839  | 2.810-2.868   |
|                            |          | 55-64                 | 5.269  | 5.217-5.323   |
|                            |          | 65+                   | 7.671  | 7.597-7.745   |
|                            | Gender   | Male (reference)      | -      |               |
|                            |          | Female                | 1.068  | 1.063-1.074   |
|                            | Constant |                       | .088   |               |



**Table 4. Results of six regressions showing independent predictors of comorbid conditions in the adult population with autism**

| Condition                               | Variable |                   | Odds ratio | 95% confidence interval |
|-----------------------------------------|----------|-------------------|------------|-------------------------|
| <b>Deafness or partial hearing loss</b> | Age      | 25-34 (reference) | -          |                         |
|                                         |          | 35-44             | 1.189      | .934-1.514              |
|                                         |          | 45-54             | 2.178      | 1.738-2.731             |
|                                         |          | 55-64             | 3.920      | 3.088-4.975             |
|                                         |          | 65+               | 11.179     | 8.972-13.929            |
|                                         | Gender   | Male (reference)  | -          |                         |
|                                         |          | Female            | 1.169      | 1.001-1.365             |
| Constant                                |          | .070              |            |                         |
| <b>Blindness or partial sight loss</b>  | Age      | 25-34 (reference) | -          |                         |
|                                         |          | 35-44             | 1.179      | .936-1.485              |
|                                         |          | 45-54             | 1.750      | 1.397-2.192             |
|                                         |          | 55-64             | 2.378      | 1.851-3.056             |
|                                         |          | 65+               | 5.148      | 4.117-6.438             |
|                                         | Gender   | Male (reference)  | -          |                         |
|                                         |          | Female            | 1.232      | 1.051-1.443             |
| Constant                                |          | .077              |            |                         |
| <b>Intellectual disabilities</b>        | Age      | 25-34 (reference) | -          |                         |
|                                         |          | 35-44             | 1.163      | 1.008-1.343             |
|                                         |          | 45-54             | 1.363      | 1.172-1.584             |
|                                         |          | 55-64             | 1.656      | 1.384-1.981             |
|                                         |          | 65+               | 1.505      | 1.254-1.807             |
|                                         | Gender   | Male (reference)  | -          |                         |
|                                         |          | Female            | 1.354      | 1.209-1.516             |
| Constant                                |          | .309              |            |                         |
| <b>Mental health condition</b>          | Age      | 25-34 (reference) | -          |                         |
|                                         |          | 35-44             | 1.455      | 1.269-1.668             |
|                                         |          | 45-54             | 1.485      | 1.284-1.719             |
|                                         |          | 55-64             | 1.548      | 1.297-1.849             |
|                                         |          | 65+               | 1.531      | 1.280-1.832             |
|                                         | Gender   | Male (reference)  | -          |                         |
|                                         |          | Female            | 1.155      | 1.034-1.291             |
| Constant                                |          | .362              |            |                         |
| <b>Physical disability</b>              | Age      | 25-34 (reference) | -          |                         |
|                                         |          | 35-44             | 1.220      | 1.038-1.434             |
|                                         |          | 45-54             | 1.487      | 1.258-1.758             |
|                                         |          | 55-64             | 2.312      | 1.913-2.795             |

|                        |          |                   |       |             |
|------------------------|----------|-------------------|-------|-------------|
|                        |          | 65+               | 3.634 | 3.022-4.370 |
|                        | Gender   | Male (reference)  | -     |             |
|                        |          | Female            | 1.504 | 1.333-1.697 |
|                        | Constant |                   | .187  |             |
| <b>Other condition</b> | Age      | 25-34 (reference) | -     |             |
|                        |          | 35-44             | 1.276 | 1.109-1.467 |
|                        |          | 45-54             | 1.419 | 1.224-1.645 |
|                        |          | 55-64             | 2.134 | 1.792-2.542 |
|                        |          | 65+               | 2.901 | 2.433-3.459 |
|                        | Gender   | Male (reference)  | -     |             |
|                        |          | Female            | 1.563 | 1.400-1.745 |
|                        | Constant |                   | .321  |             |

**STROBE 2007 (v4) Statement—Checklist of items that should be included in reports of *cross-sectional studies***

| Section/Topic             | Item # | Recommendation                                                                                                                                                                       | Reported on page #                            |
|---------------------------|--------|--------------------------------------------------------------------------------------------------------------------------------------------------------------------------------------|-----------------------------------------------|
| <b>Title and abstract</b> | 1      | (a) Indicate the study’s design with a commonly used term in the title or the abstract                                                                                               | Page 1                                        |
|                           |        | (b) Provide in the abstract an informative and balanced summary of what was done and what was found                                                                                  | Page 2                                        |
| <b>Introduction</b>       |        |                                                                                                                                                                                      |                                               |
| Background/rationale      | 2      | Explain the scientific background and rationale for the investigation being reported                                                                                                 | Page 4-5<br>Section: Introduction             |
| Objectives                | 3      | State specific objectives, including any prespecified hypotheses                                                                                                                     | Page 5<br>Section: Introduction               |
| <b>Methods</b>            |        |                                                                                                                                                                                      |                                               |
| Study design              | 4      | Present key elements of study design early in the paper                                                                                                                              | Page 5-6<br>Section: Methods/Data source      |
| Setting                   | 5      | Describe the setting, locations, and relevant dates, including periods of recruitment, exposure, follow-up, and data collection                                                      | Page 5-6<br>Section: Methods/Data source      |
| Participants              | 6      | (a) Give the eligibility criteria, and the sources and methods of selection of participants                                                                                          | Page 6-8<br>Section: Methods/Census variables |
| Variables                 | 7      | Clearly define all outcomes, exposures, predictors, potential confounders, and effect modifiers. Give diagnostic criteria, if applicable                                             | Page 6-8<br>Section: Methods/Census variables |
| Data sources/ measurement | 8*     | For each variable of interest, give sources of data and details of methods of assessment (measurement). Describe comparability of assessment methods if there is more than one group | Page 6-8<br>Section: Methods/Census variables |
| Bias                      | 9      | Describe any efforts to address potential sources of bias                                                                                                                            | Page 5-8<br>Section: Methods                  |
| Study size                | 10     | Explain how the study size was arrived at                                                                                                                                            | Page 5-6<br>Section: Methods/Data             |

|                        |     |                                                                                                                                                                                                   |                                                                              |
|------------------------|-----|---------------------------------------------------------------------------------------------------------------------------------------------------------------------------------------------------|------------------------------------------------------------------------------|
|                        |     |                                                                                                                                                                                                   | source                                                                       |
| Quantitative variables | 11  | Explain how quantitative variables were handled in the analyses. If applicable, describe which groupings were chosen and why                                                                      | Page 8<br>Section: Methods/Data analysis                                     |
| Statistical methods    | 12  | (a) Describe all statistical methods, including those used to control for confounding                                                                                                             | Page 8<br>Section: Methods/Data analysis                                     |
|                        |     | (b) Describe any methods used to examine subgroups and interactions                                                                                                                               | Page 8<br>Section: Methods/Data analysis                                     |
|                        |     | (c) Explain how missing data were addressed                                                                                                                                                       | Page 5-6<br>Section: Methods/Data source                                     |
|                        |     | (d) If applicable, describe analytical methods taking account of sampling strategy                                                                                                                | N/A                                                                          |
|                        |     | (e) Describe any sensitivity analyses                                                                                                                                                             | N/A                                                                          |
| <b>Results</b>         |     |                                                                                                                                                                                                   |                                                                              |
| Participants           | 13* | (a) Report numbers of individuals at each stage of study—eg numbers potentially eligible, examined for eligibility, confirmed eligible, included in the study, completing follow-up, and analysed | Page 9<br>Section:<br>Results/Participant characteristics                    |
|                        |     | (b) Give reasons for non-participation at each stage                                                                                                                                              | N/A                                                                          |
|                        |     | (c) Consider use of a flow diagram                                                                                                                                                                | N/A                                                                          |
| Descriptive data       | 14* | (a) Give characteristics of study participants (eg demographic, clinical, social) and information on exposures and potential confounders                                                          | Page 9<br>Section:<br>Results/Participant characteristics<br>Page 16 Table 1 |
|                        |     | (b) Indicate number of participants with missing data for each variable of interest                                                                                                               | Page 5-6<br>Section: Methods/Data source                                     |
| Outcome data           | 15* | Report numbers of outcome events or summary measures                                                                                                                                              | N/A                                                                          |

|                                                                               |                          |    |                                                                                                                                                                                                                |                                                                                                        |
|-------------------------------------------------------------------------------|--------------------------|----|----------------------------------------------------------------------------------------------------------------------------------------------------------------------------------------------------------------|--------------------------------------------------------------------------------------------------------|
| 1<br>2<br>3<br>4<br>5<br>6<br>7<br>8<br>9<br>10<br>11<br>12<br>13<br>14<br>15 | Main results             | 16 | (a) Give unadjusted estimates and, if applicable, confounder-adjusted estimates and their precision (e.g., 95% confidence interval). Make clear which confounders were adjusted for and why they were included | Pages 9-10<br>Section:<br>results/Prevalence of<br>reported comorbidities<br>Pages 17-24 Tables 2-4    |
| 16<br>17<br>18<br>19<br>20<br>21<br>22<br>23<br>24<br>25<br>26<br>27          |                          |    | (b) Report category boundaries when continuous variables were categorized                                                                                                                                      | Page 8<br>Section: Methods/data<br>analysis<br>Pages 16-24 Tables 1-4                                  |
| 28<br>29<br>30<br>31<br>32<br>33                                              |                          |    | (c) If relevant, consider translating estimates of relative risk into absolute risk for a meaningful time period                                                                                               | N/A                                                                                                    |
| 34<br>35<br>36<br>37                                                          | Other analyses           | 17 | Report other analyses done—eg analyses of subgroups and interactions, and sensitivity analyses                                                                                                                 | N/A                                                                                                    |
| 38                                                                            | <b>Discussion</b>        |    |                                                                                                                                                                                                                |                                                                                                        |
| 39<br>40<br>41<br>42<br>43<br>44<br>45<br>46<br>47                            | Key results              | 18 | Summarise key results with reference to study objectives                                                                                                                                                       | Page 10-11<br>Section: Discussion/<br>Principal findings and<br>comparison with existing<br>literature |
|                                                                               | Limitations              | 19 | Discuss limitations of the study, taking into account sources of potential bias or imprecision. Discuss both direction and magnitude of any potential bias                                                     | Page 12<br>Section: Strengths and<br>limitations                                                       |
|                                                                               | Interpretation           | 20 | Give a cautious overall interpretation of results considering objectives, limitations, multiplicity of analyses, results from similar studies, and other relevant evidence                                     | Page 10-11<br>Section: Discussion/<br>Principal findings and<br>comparison with existing<br>literature |
|                                                                               | Generalisability         | 21 | Discuss the generalisability (external validity) of the study results                                                                                                                                          | Page 12-13<br>Section: Implications for<br>clinicians                                                  |
|                                                                               | <b>Other information</b> |    |                                                                                                                                                                                                                |                                                                                                        |
|                                                                               | Funding                  | 22 | Give the source of funding and the role of the funders for the present study and, if applicable, for the original study on which the present article is based                                                  | Page 13<br>Section: Funding                                                                            |

1  
2  
3  
4  
5 \*Give information separately for exposed and unexposed groups.  
6

7 **Note:** An Explanation and Elaboration article discusses each checklist item and gives methodological background and published examples of transparent reporting. The STROBE  
8 checklist is best used in conjunction with this article (freely available on the Web sites of PLoS Medicine at <http://www.plosmedicine.org/>, Annals of Internal Medicine at  
9 <http://www.annals.org/>, and Epidemiology at <http://www.epidem.com/>). Information on the STROBE Initiative is available at [www.strobe-statement.org](http://www.strobe-statement.org).  
10  
11  
12  
13  
14  
15  
16  
17  
18  
19  
20  
21  
22  
23  
24  
25  
26  
27  
28  
29  
30  
31  
32  
33  
34  
35  
36  
37  
38  
39  
40  
41  
42  
43  
44  
45  
46  
47

For peer review only

# BMJ Open

## Prevalence of long-term health conditions in adults with autism - observational study of a whole country population

|                                 |                                                                                                                                                                                                                                                                                                                                                                                                                                                                                                                                                                                                                          |
|---------------------------------|--------------------------------------------------------------------------------------------------------------------------------------------------------------------------------------------------------------------------------------------------------------------------------------------------------------------------------------------------------------------------------------------------------------------------------------------------------------------------------------------------------------------------------------------------------------------------------------------------------------------------|
| Journal:                        | <i>BMJ Open</i>                                                                                                                                                                                                                                                                                                                                                                                                                                                                                                                                                                                                          |
| Manuscript ID                   | bmjopen-2018-023945.R1                                                                                                                                                                                                                                                                                                                                                                                                                                                                                                                                                                                                   |
| Article Type:                   | Research                                                                                                                                                                                                                                                                                                                                                                                                                                                                                                                                                                                                                 |
| Date Submitted by the Author:   | 20-Jun-2018                                                                                                                                                                                                                                                                                                                                                                                                                                                                                                                                                                                                              |
| Complete List of Authors:       | Rydzewska, Ewelina; University of Glasgow, Institute of Health and Wellbeing<br>Hughes-McCormack, Laura; University of Glasgow, Institute of Health and Wellbeing<br>Gillberg, Christopher; Goteborgs universitet Naturvetenskapliga Fakulteten, Department of Psychiatry and Neurochemis<br>Henderson, Angela; University of Glasgow, Institute of Health and Wellbeing<br>MacIntyre, Cecilia; National Records of Scotland, Census User Needs, Content and Benefits<br>Rintoul, Julie; Scottish Government, Health & Social Care Analysis<br>Cooper, Sally-Ann; Glasgow University , Institute of Health and Wellbeing |
| <b>Primary Subject Heading</b>: | Public health                                                                                                                                                                                                                                                                                                                                                                                                                                                                                                                                                                                                            |
| Secondary Subject Heading:      | Mental health                                                                                                                                                                                                                                                                                                                                                                                                                                                                                                                                                                                                            |
| Keywords:                       | autism, adults, prevalence, comorbidity, MENTAL HEALTH, physical disabilities                                                                                                                                                                                                                                                                                                                                                                                                                                                                                                                                            |
|                                 |                                                                                                                                                                                                                                                                                                                                                                                                                                                                                                                                                                                                                          |

SCHOLARONE™  
Manuscripts

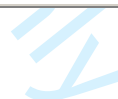

1  
2  
3 **Prevalence of long-term health conditions in adults with autism - observational study**  
4 **of a whole country population**  
5  
6

7 Ewelina Rydzewska, Laura A Hughes-McCormack, Christopher Gillberg, Angela Henderson,  
8 Cecilia MacIntyre, Julie Rintoul, Sally-Ann Cooper  
9

10 Institute of Health and Wellbeing, University of Glasgow, Mental Health and Wellbeing  
11 Group, 1st Floor, Administrative Building, Gartnavel Royal Hospital, 1055 Great Western  
12 Road, Glasgow G12 0XH, UK  
13 Ewelina Rydzewska  
14 Research Associate  
15

16 Institute of Health and Wellbeing, University of Glasgow, Mental Health and Wellbeing  
17 Group, 1st Floor, Administrative Building, Gartnavel Royal Hospital, 1055 Great Western  
18 Road, Glasgow G12 0XH, UK  
19 Laura A Hughes-McCormack  
20 Research Assistant  
21

22 1 Göteborgs Universitet/University of Gothenburg, Gillbergcentrum/Gillberg Neuropsychiatry  
23 Centre, Kungsgatan 12, S-411 19 Göteborg, Sweden  
24 2 Institute of Health and Wellbeing, University of Glasgow, Mental Health and Wellbeing  
25 Group, 1st Floor, Administrative Building, Gartnavel Royal Hospital, 1055 Great Western  
26 Road, Glasgow G12 0XH, UK  
27 Christopher Gillberg  
28 Professor of Child and Adolescent Psychiatry  
29

30 Institute of Health and Wellbeing, University of Glasgow, Mental Health and Wellbeing  
31 Group, 1st Floor, Administrative Building, Gartnavel Royal Hospital, 1055 Great Western  
32 Road, Glasgow G12 0XH, UK  
33 Angela Henderson  
34 Scottish Learning Disabilities Observatory Deputy Director  
35

36 Census User Needs, Content and Benefits, National Records of Scotland, Ladywell House,  
37 Edinburgh EH12 7TF, UK  
38 Cecilia MacIntyre  
39 Statistician  
40

41 Health & Social Care Analysis, Scottish Government, St. Andrew's House, Regent Road,  
42 Edinburgh EH1 3DG, UK  
43 Julie Rintoul  
44 Statistician  
45

46 Institute of Health and Wellbeing, University of Glasgow, Mental Health and Wellbeing  
47 Group, 1st Floor, Administrative Building, Gartnavel Royal Hospital, 1055 Great Western  
48 Road, Glasgow G12 0XH, UK  
49 Sally-Ann Cooper  
50 Professor of Learning Disabilities  
51

52 **Corresponding author:**  
53 Professor Sally-Ann Cooper  
54 Email: [Sally-Ann.Cooper@glasgow.ac.uk](mailto:Sally-Ann.Cooper@glasgow.ac.uk)  
55  
56  
57  
58  
59  
60



**Abstract****Objectives:**

To investigate the prevalence of comorbid mental health conditions and physical disabilities in a whole country population of adults aged 25+ with and without reported autism.

**Design:**

Secondary analysis of Scotland's Census, 2011 data. Cross-sectional study.

**Setting:**

General population.

**Participants:**

94% of Scotland's population, including 6,649/3,746,584 adults aged 25+ reported to have autism.

**Main outcome measures:**

Prevalence of six comorbidities: deafness or partial hearing loss, blindness or partial sight loss, intellectual disabilities, mental health conditions, physical disability, and other condition; odds ratios (OR: 95% confidence intervals) of autism predicting these comorbidities, adjusted for age and gender; and OR for age and gender in predicting comorbidities within the population with reported autism.

**Results:**

Comorbidities were common: deafness/hearing loss - 17.5%; blindness/sight loss - 12.1%; intellectual disabilities - 29.4%; mental health conditions - 33.0%; physical disability - 30.7%; other condition - 34.1%. Autism statistically predicted all of the conditions: OR=3.3 (3.1 to 3.6) for deafness or partial hearing loss, OR=8.5 (7.9 to 9.2) for blindness or partial sight loss, OR=94.6 (89.4 to 100.0) for intellectual disabilities, OR=8.6 (8.2 to 9.0) for mental health conditions, OR=6.2 (5.8 to 6.6) for physical disability, and OR=2.6 (2.5 to 2.8) for other condition. Contrary to findings within the general population, female gender predicted all conditions within the population with reported autism, including intellectual disabilities (OR=1.4).

**Conclusions:**

Clinicians need heightened awareness of comorbidities in adults with autism to improve detection and suitable care, especially given the added complexity of assessment in this population and the fact that hearing and visual impairments may cause additional difficulties with reciprocal communication which are also a feature of autism; hence posing further challenges in assessment.

1  
2  
3 **Keywords:** autism, adults, prevalence, comorbidity, mental health, physical  
4 disabilities, health inequalities  
5  
6

7  
8 **Strengths and limitations of this study:**  
9

- 10
- 11 • Unique study of comorbidity in adults with reported autism in a whole country  
12 population  
13
  - 14 • High response rate of 94%, and systematic enquiry of everyone regarding  
15 autism and comorbidities (deafness, blindness, intellectual disabilities, mental  
16 health condition, physical disability, and other condition)  
17
  - 18 • Results of the study are generalisable to other adult populations in high-  
19 income countries  
20
  - 21 • Findings are limited by the broad survey reporting of comorbidities, rather  
22 than detailed examinations  
23  
24  
25  
26  
27  
28  
29  
30  
31  
32  
33  
34  
35  
36  
37  
38  
39  
40  
41  
42  
43  
44  
45  
46  
47  
48  
49  
50  
51  
52  
53  
54  
55  
56  
57  
58  
59  
60

## Introduction

In the last 20 years, there has been a considerable increase in awareness of autism, but research on the comorbid conditions that adults with autism experience is limited.<sup>1</sup> It has been suggested that some comorbidities are more common in children with autism than in the general population,<sup>2</sup> but little research has been conducted with adults. Given the communicative and other problems that are a prominent feature of autism, the detection and management of comorbid conditions in people with autism is more complex than for other people. Therefore, it is important to know whether or not health problems are more common than in the general population. Empirically founded information about autism comorbidity would help to raise clinicians' awareness, and in turn increase identification and appropriate management.

Mental health has been studied more than physical health in adults with autism. However, systematic reviews reveal wide variation in reported prevalence of mental ill-health between studies. This is partly because almost all studies are based on clinical populations. Therefore, findings cannot be generalised with confidence, and additionally most study samples are small in size, and very few have drawn comparisons with the general population. It has been suggested that depression,<sup>3</sup> bipolar disorder,<sup>4</sup> suicidal thoughts/behaviour,<sup>5</sup> non-affective psychosis,<sup>6</sup> and attention-deficit hyperactivity disorder<sup>7,8</sup> may be more common in adults with autism. A further study in North California, USA, used medical records from a single health delivery provider of inpatient and outpatient medical and mental health services to identify 1,507/1,578,658 (0.1%) adults with autism, who were age and gender matched with controls without recorded autism.<sup>9</sup> The study found that 19.2% of the adults with autism also had a record of intellectual disabilities, and 54% also had a record of one or more mental health conditions; with rates of individual mental conditions being 3-22 times higher for the adults with autism than their controls, and higher in the women with autism than in the men with autism.<sup>9</sup> The study does, however, reflect the sampling frame; only those individuals with an existing record of autism in their medical records were identified as having autism.

1  
2  
3 Blindness/sight loss, deafness/hearing loss, and physical disabilities may be more  
4 common in adults with autism than in other people, but most of the existing literature  
5 is drawn from non-representative and/or small populations, and without general  
6 population comparisons; hence leaving significant doubts as to the actual degree of  
7 overrepresentation. One exception is the North California study of a wide range of  
8 conditions recorded in medical records which found 16 (1.1%) adults with autism to  
9 have low vision or blindness (OR=7.85), and 71 (4.7%) with hearing impairment  
10 (OR=2.35).<sup>9</sup> A further large study across 25 states in USA included 1,002 adults  
11 known to have autism, but was drawn from the population receiving intellectual and  
12 developmental disabilities services; hence it is clearly not representative of the  
13 population of adults with autism.<sup>10</sup> Indeed, only 97 participants (9.7%) did not have  
14 intellectual disabilities, so whilst 9.4% had visual impairments, 5.7% had hearing  
15 impairments, and 6.0% had physical disability, these rates cannot be generalised to  
16 the wider population with autism. In a study of 92/305 adults aged 23-50 who had  
17 been identified to have autism in childhood in the 1980s, 11 of whom were  
18 deceased, participants answered questions on medical conditions and symptoms.<sup>11</sup>  
19 Of the 92, 73% had intellectual disabilities, 12% had hearing impairment, and 25%  
20 visual impairment.<sup>11</sup> Neither of these two studies included a general population  
21 comparison group. We were unable to identify any other studies on these conditions  
22 in adults with autism.  
23  
24  
25  
26  
27  
28  
29  
30  
31  
32  
33  
34

35  
36  
37 This study aimed to investigate the prevalence and predictors of deafness or partial  
38 hearing loss, blindness or partial sight loss, intellectual disabilities, mental health  
39 conditions, physical disability, and other condition, in a whole country population of  
40 adults with reported autism aged 25+ compared with their peers without autism.  
41  
42  
43  
44

## 45 **Methods**

### 46 **Data source**

47  
48 Scotland's Census, 2011, provides information on Scotland's population on the  
49 census date, 27 March 2011. Approval was gained from the Scottish Government for  
50 secondary analysis of the Census data. The Census includes the whole Scottish  
51 population, whether living in communal establishments (such as care homes and  
52 student halls of residence) or private households. Scotland's Census is one of the  
53  
54  
55  
56  
57  
58  
59

1  
2  
3 few country censuses that asks every person in the country whether or not they have  
4 autism, indeed it may be unique in this regard. One householder on behalf of all  
5 occupants in private households (the household reference person), and manager on  
6 behalf of all occupants in communal dwellings, was required to complete the Census  
7 information. The Census team also followed up non-responders and provided help to  
8 respond when needed. The Census form clearly states that it is a legal requirement  
9 to complete the form, and non-completion, or supplying false information attracts a  
10 £1,000 fine. The Census is conducted every 10 years. In 2011, it was estimated to  
11 have achieved a 94% response rate.<sup>12</sup> During the original data processing, the  
12 Census team adjusted for the 6% of the total population of Scotland for whom there  
13 was not completed Census data. This used a Census Coverage Survey (including  
14 around 40,000 households) to estimate numbers and characteristics. The Coverage  
15 Survey and Census records were matched using automated and clerical matching.  
16 All Census individuals, including individuals reporting long-term health conditions,  
17 were deterministically matched to check if any records were duplicated. Individuals  
18 estimated to have been missed from the Census were then imputed, using a subset  
19 of characteristics from real individuals, including information on their health, to reach  
20 the 100% dataset completeness rate. The process of development of the Scotland's  
21 Census 2011 Edit and Imputation Methodology was adapted from the Office for  
22 National Statistics rigorous and systematic guidelines, which are available here:

23  
24  
25  
26  
27  
28  
29  
30  
31  
32  
33  
34  
35 <http://webarchive.nationalarchives.gov.uk/20160108193745/http://www.ons.gov.uk/ons/guide-method/method-quality/survey-methodology-bulletin/smb-69/index.html>

36  
37  
38 Further details on how the Census population estimates were arrived at are also  
39 available here:

40  
41  
42 <http://www.scotlandscensus.gov.uk/documents/censusresults/release1b/rel1bmethodology.pdf>

43  
44  
45 Full details of the methodology and other background information on Scotland's  
46 Census 2011 are available at:

47  
48 <http://www.scotlandscensus.gov.uk/supporting-information>.

### 51 **Census variables**

52  
53 Self/proxy-reporting was used to identify people with autism and other long-term  
54 conditions from the Census questionnaire, Question 20: 'Do you have any of the  
55 following conditions which have lasted, or are expected to last, at least 12 months?  
56  
57

1  
2  
3 Tick all that apply'. Respondents were given a choice of 10 response options: (1)  
4 deafness or partial hearing loss, (2) blindness or partial sight loss, (3) learning  
5 disability (for example, Down's syndrome), (4) learning difficulty (for example,  
6 dyslexia), (5) developmental disorder (for example, autistic spectrum disorder or  
7 Asperger's syndrome), (6) physical disability, (7) mental health condition, (8) long-  
8 term illness, disease or condition (9) other condition, (10) no condition. Following  
9 internal requirements for all Scotland's Census 2011 outputs stipulated by the  
10 National Records of Scotland, options 8 (long-term illness, disease or condition) and  
11 9 (other condition) were merged and coded as one category of 'other condition';  
12 thus, this term is used henceforth when referring to both these categories.  
13  
14  
15  
16  
17  
18  
19

20  
21 Importantly, whilst Question 20: 'Do you have any of the following conditions which  
22 have lasted, or are expected to last, at least 12 months?', included the broad term  
23 developmental disorder, it only provided reference to 'autistic spectrum disorder' and  
24 'Asperger's syndrome'. For the purpose of this study we, therefore, interpreted  
25 responses to this question as relating to people who know they have these  
26 conditions, henceforth referred to as autism. Additionally, the question distinguished  
27 autism from learning disability (which in the UK is synonymous to the international  
28 term 'intellectual disabilities'), learning difficulty (which in the UK is synonymous to  
29 the international term 'specific learning disability' such as dyslexia), and mental  
30 health conditions, which are important distinctions.  
31  
32  
33  
34  
35  
36  
37

38  
39 As part of the methodological preparations for Scotland's Census, 2011, the General  
40 Register Office for Scotland commissioned Ipsos MORI Scotland to undertake  
41 cognitive question testing of the question 20 long term health conditions and  
42 disabilities. The aim was primarily to test whether the questions were answered  
43 accurately and willingly by respondents, and what changes might be required to  
44 improve data quality and/or the acceptability of the response options. Cognitive  
45 interviewing is a widely used approach to critically evaluate survey questionnaires.<sup>13</sup>  
46 It enables researchers to modify survey material to enhance clarity. Retrospective  
47 probing was deemed to be the most appropriate of the different techniques for the  
48 Census. The questions were tested with 102 participants with a mix of gender and  
49 age, both with and without the health conditions and disabilities (including people  
50 with more than one of the conditions), to ensure accurate and willing completion, and  
51  
52  
53  
54  
55  
56  
57  
58  
59  
60

1  
2  
3 included people with autism, intellectual disabilities, dyslexia, dyspraxia, speech  
4 impairment, mental health conditions (both milder and more serious), and other long-  
5 term conditions. This resulted in a redesign of the question on autism, to  
6 'Developmental disorder, for example autism spectrum disorder or Asperger's  
7 syndrome' in order to accurately capture specifically the data on autism. The  
8 questions on the other conditions tested (some of which, from a medical perspective,  
9 can be considered as developmental disorders) did not require any modification.  
10  
11 Further information can be found at:  
12  
13

14  
15  
16 [http://www.scotlandscensus.gov.uk/documents/research/2011-census-health-  
18 disability-questions.pdf](http://www.scotlandscensus.gov.uk/documents/research/2011-census-health-<br/>17 disability-questions.pdf)

19 [http://www.scotlandscensus.gov.uk/documents/legislation/changes-to-gov-  
21 statement-report.pdf](http://www.scotlandscensus.gov.uk/documents/legislation/changes-to-gov-<br/>20 statement-report.pdf)  
22  
23

## 24 **Data Analysis**

25 We calculated the numbers and percentages of people with and without reported  
26 autism reporting deafness or partial hearing loss, blindness or partial sight loss,  
27 intellectual disabilities, mental health conditions, physical disability, and other  
28 condition. We compared differences between the populations with and without  
29 reported autism using chi-square tests. Within the whole population, we then used  
30 six binary logistic regressions to calculate odds ratios (OR: 95% confidence  
31 intervals) of autism predicting having each of the six types of additional health  
32 conditions, adjusted for age group and gender. We then calculated the ORs for age  
33 group and gender in predicting each of the six comorbidities within the population  
34 with reported autism. All analyses were conducted with SPSS software version 22.  
35  
36  
37  
38  
39  
40  
41  
42

## 43 **Patient and Public Involvement**

44 The question on autism was included in Scotland's Census, 2011 at the behest of  
45 third sector organisations for people with autism. This study was undertaken by the  
46 Scottish Learning Disabilities Observatory, which has a specific remit for people with  
47 autism; its steering group includes partners from the third sector organisations.  
48 Results from this study will be disseminated for people with autism in easy-read  
49 version via the Scottish Learning Disabilities Observatory website and newsletters.  
50  
51  
52  
53  
54  
55  
56  
57  
58  
59  
60



## Results

### Participant characteristics

Scotland's Census 2011 included records on 5,295,403 people. There were 6,649/3,746,584 (0.2%) adults aged 25+ recorded to have autism as defined here, 4,610 (69.3%) of whom were men and 2,039 (30.7%) women compared with 1,776,845 (47.5%) men and 1,963,090 (52.5%) women in the adult population without autism (Table 1). The rate of autism was lowest in the oldest age groups (autism may be associated with reduced life expectancy).

- Insert Table 1 here -

### Prevalence of reported comorbidities

The adult population with reported autism was significantly more likely to have each of the additional health conditions when compared to the population without reported autism, with each at the  $p < 0.001$  level (Table 2).

- Insert Table 2 here -

Table 3 shows the OR (95% Confidence intervals) of autism predicting each of the six conditions: OR=3.3 (3.1-3.6) for deafness or partial hearing loss, OR=8.5 (7.9-9.2) for blindness or partial sight loss, OR=94.6 (89.4-100.0) for intellectual disabilities, OR=8.6 (8.2-9.0) for mental health conditions, OR=6.2 (5.8-6.6) for physical disability, and OR=2.6 (2.5-2.8) for other condition. Table 4 shows the OR (95% Confidence interval) of age and gender in predicting comorbidities within the population with autism aged 25+. As one would expect, in the whole population, older age group statistically predicted blindness, deafness, physical disability and other condition, whilst age over 55 reduced the likelihood of intellectual disabilities (presumably due to early death), as did the 65+ age group for mental health conditions. Female gender predicted blindness, mental health conditions, physical disability and other condition, whilst male gender predicted deafness and intellectual



1  
2  
3 disabilities. Within the population with reported autism, older age group also  
4 statistically predicted blindness, deafness, physical disability and other condition, but  
5 not intellectual disabilities and mental health conditions. Contrary to findings in the  
6 general population, female gender predicted all conditions within the population with  
7 reported autism.  
8  
9  
10

11  
12 - Insert Tables 3 and 4 here -  
13  
14  
15

## 16 Discussion

### 17 Principal findings and comparison with existing literature

18  
19 Comorbidity is substantially greater in adults with reported autism than in other  
20 people; with odds ratios of 95 for intellectual disabilities, 9 for mental health  
21 conditions, 9 for deafness or partial hearing loss, 6 for physical disability, 3 for  
22 blindness or partial sight loss, and 3 for other condition. All these conditions were  
23 common in adults with reported autism. These findings are important given the gap  
24 in evidence, as clinicians need to have heightened awareness of potential  
25 comorbidities in order to provide suitable investigation and management to maximise  
26 functioning and therefore improve quality of life. Findings on hearing and visual  
27 impairments for people with reported autism are perhaps particularly important, given  
28 the impact of these impairments on reciprocal communication, which is also an  
29 integral underlying impairment in autism. Clinical assessments of people with autism  
30 are more complex and take longer than for the average person. Nevertheless, our  
31 findings have demonstrated that investment in such assessments is necessary and  
32 important given the much higher prevalence of comorbidities.  
33  
34  
35  
36  
37  
38  
39  
40  
41  
42  
43  
44

45 We found mental health conditions in 33% of all adults with reported autism (range  
46 23-37% depending on age group; 27%-37% for men and 30%-40% for women). This  
47 high rate is lower than a previous report of 54%<sup>9</sup>, but their sample may have been  
48 biased to a more severely affected/complex population given their sampling, as  
49 shown by their lower identification rate for autism. We found 14% with hearing  
50 impairment (range 7%-46% depending on age group; 5%-44% for men and 11%-  
51 47% for women), and 12% with visual impairments (range 7%-30% depending on  
52  
53  
54  
55  
56  
57  
58  
59  
60

1  
2  
3 age group; 7%-27% for men and 10%-35% for women), notably higher than the rates  
4 recorded in medical records reported in the North California study (4.7% and 1.1%  
5 respectively, though ORs were not dissimilar)<sup>9</sup> likely reflecting the different study  
6 methodologies. In the study of 92 adults with autism, 12% had hearing impairment,  
7 and 25% visual impairment,<sup>11</sup> respectively, though the study was much smaller and  
8 of limited age range than in our study. A high rate of intellectual disabilities in  
9 children with autism has been described previously; we have now quantified the  
10 extent of this - 29% (25%-32% depending on age group; 22%-35% for men and  
11 31%-42% for women) - in a much larger study of adults. There are few other studies  
12 with which we can draw comparisons, and we identified none on physical disability in  
13 adults with autism with which we could compare the high rate of 24% for all adults  
14 aged 25+ (range 15%-45% depending on age group; 14%-42% for men and 24%-  
15 45% for women).

16  
17  
18  
19  
20  
21  
22  
23  
24  
25  
26 A view has been expressed that autism is currently underdiagnosed in more  
27 intellectually-able females compared with males.<sup>14</sup> We found that 34% of women  
28 compared with only 27% of men with autism reported accompanying intellectual  
29 disabilities, so the female population with autism was intellectually less able than the  
30 male population with autism. Our findings may therefore provide some evidence to  
31 support the view of under-diagnosis of autism in the more intellectually-able women.  
32 Alternatively, women and men with autism may actually be intellectually different.

33  
34  
35  
36  
37  
38  
39 We have previously reported Census findings on comorbidities for people with  
40 intellectual disabilities.<sup>15</sup> Many conditions are related to intellectual level, with there  
41 being a gradient across the whole spread of intelligence (not just intellectual  
42 disabilities).<sup>16</sup> Given the lower average intelligence we found in the autistic women  
43 than the autistic men, one might expect more comorbidities to be found in the  
44 women than the men. Indeed, the women with autism had higher rates of all six  
45 comorbidities than did the men with autism; odds ratio of female gender predicting  
46 each of the six comorbidities was greater for all conditions (except mental health) in  
47 the population with autism compared with the whole population, and indeed reversed  
48 for deafness and intellectual disabilities which were more common in men in the  
49 whole population. Alternatively, these findings could support the view that in some  
50 cases it is the concept of 'Autism Plus' (i.e. autism co-occurring with any other major  
51  
52  
53  
54  
55  
56  
57  
58  
59  
60

1  
2  
3 neurodevelopmental disorder),<sup>17</sup> which ultimately results in people receiving a  
4 diagnosis of autism. Whilst this Plus element of co-occurring conditions is currently  
5 often neglected in assessment, diagnosis and intervention, in some populations,  
6 possibly including women, it may be the initial or primary reason for considering a  
7 diagnosis of autism.  
8  
9

### 10 **Strengths and limitations**

11 We believe this study to be unique in including the whole population of a country,  
12 with a high response rate, and systematic enquiry of everyone regarding autism and  
13 selected long-term conditions. The results of this study are generalisable to other  
14 adult populations in high-income countries. The concept of autistic spectrum disorder  
15 has broadened in recent years; hence our findings relate to the narrower definition  
16 that was used to diagnose autism in the past, as the study is one of adults who most  
17 likely were originally diagnosed in childhood. This accounts for the 0.2% identified  
18 prevalence; more recent studies conducting autism assessments have reported  
19 higher prevalence.<sup>18</sup> It is important to note that undiagnosed adults with milder forms  
20 of autism may have lower levels of comorbidity than those with more severe autism.  
21 Limitations may include the use of the term developmental disorders in the Census,  
22 although the clarification of this term provided on the Census form included only  
23 autistic spectrum disorder and Asperger's syndrome, and the phrasing of the  
24 question was carefully selected specifically to capture autism, from results of the  
25 cognitive question testing procedure. Furthermore, this category was distinguished  
26 from intellectual disabilities, specific learning disability, and mental health conditions,  
27 and tested with people with all these conditions. Hence, we consider that  
28 respondents will have replied accordingly, i.e. responded regarding autism.  
29 However, we have no further means to check this on the whole population.  
30 Furthermore, respondents reported whether or not each person was known to have  
31 autism rather than each person having an assessment for autism, so some reporting  
32 error is possible. Given the large number of households, we are unable to state how  
33 each household reference person approached completing the Census form, although  
34 cognitive question testing was completed with a broad range of 70 respondents on  
35 the whole questionnaire in advance of the Census (in addition to the 102  
36 respondents who completed cognitive question testing interviews specifically on the  
37 health questions). The Census form was also broad-brush in its questioning rather  
38 than including detailed sub-questions on each of the six categories of health  
39  
40  
41  
42  
43  
44  
45  
46  
47  
48  
49  
50  
51  
52  
53  
54  
55  
56  
57  
58  
59  
60

1  
2  
3 conditions. Finally, whilst we describe the imputation process, we cannot state with  
4 certainty whether or not the imputed 6% of records contained the same, more or  
5 fewer proportion of adults with autism, but note that this missing 6% is a small  
6 proportion overall. Despite this, we believe the results of this study are generalisable  
7 to other high-income countries, as well as filling a significant gap in existing research  
8 on the prevalence of long-term health conditions in adults with autism.  
9  
10  
11  
12  
13

### 14 **Implications for clinicians**

15  
16 This study advances our knowledge of comorbidities in adults with autism, which is  
17 otherwise somewhat invisible in previous studies. Adults with reported autism have  
18 very high rates of comorbid physical disabilities as well as mental health conditions.  
19 Hearing and visual impairments are also very common, and their impact on  
20 reciprocal communication, especially if undiagnosed/unattended, may compound  
21 core features of autism. Clinicians require a heightened awareness of this, especially  
22 given the greater complexity of health assessments in adults with autism compared  
23 with other people. It is essential to have accurate information on the prevalence of  
24 comorbid conditions in adults with autism in order to accurately plan for service  
25 provision and to tackle health inequalities. Our study is large scale and robust in  
26 design, but requires replication given the relative lack of previous study on this topic.  
27  
28  
29  
30  
31  
32  
33  
34

35 **Word count: 3,242**

### 36 **Acknowledgements:**

37  
38 We thank the National Records of Scotland for assisting with the data analysis and  
39 dissemination stages of the project.  
40  
41  
42  
43

### 44 **Contributors:**

45 ER analysed the data, jointly interpreted it, and wrote the first draft of the manuscript,  
46 LAH-M, CG, and AH jointly interpreted the data, and contributed to the manuscript,  
47 CM and JR worked on the Census, jointly interpreted the data, and contributed to the  
48 manuscript, S-AC conceived the project, interpreted the data, and contributed to the  
49 manuscript. All authors approved the final version of the manuscript. S-AC is the  
50 study guarantor.  
51  
52  
53  
54  
55  
56  
57  
58  
59  
60

1  
2  
3 S-AC confirms the manuscript is an honest, accurate and transparent account of the  
4 study being reported, that no important aspects of the study have been omitted, and  
5 there has been no discrepancies from the study as planned.  
6  
7

#### 8 **Funding:**

9 This work was supported by the Scottish Government via the xxx. The funder had no  
10 role in the study design, collection, analyses and interpretation of data, in writing the  
11 report, nor in the decision to submit the article for publication.  
12  
13

#### 14 **Competing interests:**

15 All authors have completed the Unified Competing Interest form (available on  
16 request from the corresponding author) at [www.icmje.org/coi\\_disclosure.pdf](http://www.icmje.org/coi_disclosure.pdf) and  
17 declare: all authors had financial support from the Scottish Government for the  
18 submitted work; no financial relationships with any organisations that might have an  
19 interest in the submitted work in the previous three years; no other relationships or  
20 activities that could appear to have influenced the submitted work.  
21  
22  
23  
24

#### 25 **Patient consent:**

26 Not applicable  
27

#### 28 **Ethical approval:**

29 Permission to access data was granted by the Scottish Government.  
30  
31

#### 32 **Provenance and peer review:**

33 Not commissioned; externally peer reviewed.  
34

#### 35 **Data sharing statement:**

36 Data available at:

37 <http://www.scotlandscensus.gov.uk/ods-web/data-warehouse.html#additionaltab>  
38  
39  
40  
41

#### 42 **References:**

- 43  
44  
45 1. Perkins EA, Berkman KA. Into the unknown: aging with autism spectrum  
46 disorders. *Am J Int and Dev Dis* 2012;117:478-496.  
47 2. Gillberg C, Billstedt E. Autism and Asperger syndrome: coexistence with other  
48 clinical disorders. *Acta Psychiatr Scand* 2000;102:321-330.  
49 3. Stewart ME, Barnard L, Pearson J, *et al*. Presentation of depression in autism  
50 and Asperger syndrome. *Autism* 2006;10:103-116.  
51 4. Vannucchi G, Masi G, Toni C, *et al*. Bipolar disorder in adults with Asperger's  
52 syndrome: a systematic review. *J Affect Disord* 2014;168:151-160.  
53 5. Segers M, Rawana J. What do we know about suicidality in autism spectrum  
54 disorders? A systematic review. *Autism Research* 2014;7:507-521.  
55  
56  
57  
58  
59  
60

- 1
  - 2
  - 3
  - 4
  - 5
  - 6
  - 7
  - 8
  - 9
  - 10
  - 11
  - 12
  - 13
  - 14
  - 15
  - 16
  - 17
  - 18
  - 19
  - 20
  - 21
  - 22
  - 23
  - 24
  - 25
  - 26
  - 27
  - 28
  - 29
  - 30
  - 31
  - 32
  - 33
  - 34
  - 35
  - 36
  - 37
  - 38
  - 39
  - 40
  - 41
  - 42
  - 43
  - 44
  - 45
  - 46
  - 47
  - 48
  - 49
  - 50
  - 51
  - 52
  - 53
  - 54
  - 55
  - 56
  - 57
  - 58
  - 59
  - 60
6. Padgett FE, Miltsiou E, Tiffin PA. The co-occurrence of nonaffective psychosis and the pervasive developmental disorders: a systematic review. *J Intellect Dev Disabil* 2010;35:187-198.
7. Johnston K, Dittner A, Bramham J, *et al.* Attention deficit hyperactivity disorder symptoms in adults with autism spectrum disorders, *Autism Research* 2013;6:225-236.
8. Gillberg IC, Helles A, Billstedt E, *et al.* Boys with Asperger Syndrome Grow Up: Psychiatric and Neurodevelopmental Disorders 20 Years After Initial Diagnosis, *J Autism Dev Disord* 2016;46:74-82.
9. Croen LA, Zerbo O, Qian Y, *et al.* The health status of adults on the autism spectrum. *Autism* 2015;19:814–823.
10. Hewitt AS, Stancliffe RJ, Johnson Sirek A, *et al.* Characteristics of adults with autism spectrum disorder who use adult developmental disability services: Results from 25 US states. *Res Autism Spectr Disord* 2012;6:741–751.
11. Jones KB, Kottle K, Bakian A, *et al.* A description of medical conditions in adults with autism spectrum disorder: a follow-up of the 1980s Utah/UCLA Autism Epidemiologic Study. *Autism* 2016;20:551–561.
12. National Records of Scotland (NRS). *2011 Census Release 1C - How the 2011 Census population estimates were obtained*. Edinburgh: National Records of Scotland 2013.
13. Wills GB. *Cognitive Interviewing. A tool for improving questionnaire design*. Sage Publications. Thousand Oaks, 2005.
14. Dworzynski K, Ronald A, Bolton P, *et al.* How different are girls and boys above and below the diagnostic threshold for autism spectrum disorders? *J Am Acad Child Adolesc Psychiatry* 2012;51:788–797.
15. Hughes-McCormack LA, Rydzewska E, Henderson A, *et al.* Prevalence of mental ill-health and relationship with physical health in a whole country population of 26,349 people with intellectual disabilities, compared with the general population. *British Journal of Psychiatry Open* 2017;3(5): <http://bjpo.rcpsych.org/content/3/5/243>
16. Wraw C, Deary IJ, Gale CR, *et al.* Intelligence in youth and health at age 50. *Intelligence* 2015;53:23-32.
17. Gillberg C, Fernell E, Autism Plus Versus Autism Pure. *J Autism Dev Disord* 2014;44:3274-3276.
18. Brugha TS, Spiers N, Bankart J, *et al.* Epidemiology of autism in adults across age groups and ability levels. *Br J Psychiatry* 2016;209:498-503.

**Table 1. Number and proportion of adults with autism by age and gender**

| <b>Age</b>                 | <b>Gender</b>                | <b>Autism</b> | <b>Without autism</b> |
|----------------------------|------------------------------|---------------|-----------------------|
| <b>All adults aged 25+</b> | Male<br>N=1,781,455 (100%)   | 4,610 (0.3%)  | 1,776,845 (99.7%)     |
|                            | Female<br>N=1,965,129 (100%) | 2,039 (0.1%)  | 1,963,090 (99.9%)     |
|                            | All<br>N=3,746,584 (100%)    | 6,649 (0.2%)  | 3,739,935 (99.8%)     |
| <b>25-34 y</b>             | Male<br>N= 328,607 (100%)    | 1,753 (0.5%)  | 326,854 (99.5%)       |
|                            | Female<br>N= 338,720 (100%)  | 636 (0.2%)    | 338,084 (99.8%)       |
|                            | All<br>N= 632,488 (100%)     | 2,389 (0.4%)  | 664,938 (99.6%)       |
| <b>35-44 y</b>             | Male<br>N= 357,670 (100%)    | 1,117 (0.3%)  | 356,553 (99.7%)       |
|                            | Female<br>N= 377,084 (100%)  | 471 (0.1%)    | 376,613 (99.9%)       |
|                            | All<br>N= 734,754 (100%)     | 1,588 (0.2%)  | 733,166 (99.8%)       |
| <b>45-54 y</b>             | Male<br>N= 384,517 (100%)    | 890 (0.2%)    | 383,627 (99.8%)       |
|                            | Female<br>N= 402,239 (100%)  | 377 (0.1%)    | 401,862 (99.9%)       |
|                            | All<br>N=786,756 (100%)      | 1,267 (0.2%)  | 785,489 (99.8%)       |
| <b>55-64 y</b>             | Male<br>N= 326,922 (100%)    | 474 (0.1%)    | 326,448 (99.9%)       |
|                            | Female<br>N= 340,491 (100%)  | 233 (0.1%)    | 340,258 (99.9%)       |
|                            | All<br>N=667,413 (100%)      | 707 (0.1%)    | 666,706 (99.9%)       |
| <b>65+ y</b>               | Male<br>N= 383,739 (100%)    | 376 (0.1%)    | 383,363 (99.9%)       |
|                            | Female<br>N= 506,595 (100%)  | 322 (0.1%)    | 506,273 (99.9%)       |
|                            | All<br>N=890,334 (100%)      | 698 (0.1%)    | 889,636 (99.9%)       |



**Table 2. Prevalence of comorbidities in adults with and without autism by age and gender**

| Age group           | Condition                     | Autism                   |                            |                            | Without autism               |                                |                                |
|---------------------|-------------------------------|--------------------------|----------------------------|----------------------------|------------------------------|--------------------------------|--------------------------------|
|                     |                               | Men<br>N=4,610<br>(100%) | Women<br>N=2,039<br>(100%) | Total<br>N=6,649<br>(100%) | Men<br>N=1,776,845<br>(100%) | Women<br>N=1,963,090<br>(100%) | Total<br>N=3,739,935<br>(100%) |
| All adults aged 25+ | Deafness/partial hearing loss | 583 (12.6%)              | 356 (17.5%)                | 939 (14.1%)                | 178,994 (10.1%)              | 160,495 (8.2%)                 | 339,489 (9.1%)                 |
|                     | Blindness/partial sight loss  | 503 (10.9%)              | 304 (14.9%)                | 807 (12.1%)                | 52,351 (2.9%)                | 65,198 (3.3%)                  | 117,549 (3.1%)                 |
|                     | Intellectual disabilities     | 1,254 (27.2%)            | 699 (34.3%)                | 1,953 (29.4%)              | 8,141 (0.5%)                 | 6,859 (0.3%)                   | 15,000 (0.4%)                  |
|                     | Mental health condition       | 1,468 (31.8%)            | 728 (35.7%)                | 2,196 (33.0%)              | 90,292 (5.1%)                | 121,584 (6.2%)                 | 211,876 (5.7%)                 |
|                     | Physical disability           | 973 (21.1%)              | 626 (30.7%)                | 1,599 (24.0%)              | 150,896 (8.5%)               | 188,347 (9.6%)                 | 339,243 (9.1%)                 |
|                     | Other condition               | 1,402 (30.4%)            | 864 (42.4%)                | 2,266 (34.1%)              | 407,090 (22.9%)              | 489,875 (25.0%)                | 896,965 (24.0%)                |
|                     | 25-34 y                       |                          | Men<br>N=1,753<br>(100%)   | Women<br>N=636<br>(100%)   | Total<br>N=2,389<br>(100%)   | Men<br>N=326,854<br>(100%)     | Women<br>N=338,084<br>(100%)   |
|                     | Deafness/partial hearing loss | 94 (5.4%)                | 68 (10.7%)                 | 162 (6.8%)                 | 4,341 (1.3%)                 | 3,651 (1.1%)                   | 7,992 (1.2%)                   |
|                     | Blindness/partial sight loss  | 118 (6.7%)               | 62 (9.7%)                  | 180 (7.5%)                 | 2,382 (0.7%)                 | 1,698 (0.5%)                   | 4,080 (0.6%)                   |
|                     | Intellectual disabilities     | 391 (22.3%)              | 211 (33.2%)                | 602 (25.2%)                | 1,634 (0.5%)                 | 1,239 (0.4%)                   | 2,873 (0.4%)                   |



|                |                                      |                                   |                                   |                                     |                                     |                                       |                                       |
|----------------|--------------------------------------|-----------------------------------|-----------------------------------|-------------------------------------|-------------------------------------|---------------------------------------|---------------------------------------|
|                | <b>Mental health condition</b>       | 466 (26.6%)                       | 188 (29.6%)                       | 654 (27.4%)                         | 13,522 (4.1%)                       | 19,428 (5.7%)                         | 32,950 (5.0%)                         |
|                | <b>Physical disability</b>           | 253 (14.4%)                       | 163 (25.6%)                       | 416 (17.4%)                         | 5,616 (1.7%)                        | 5,200 (1.5%)                          | 10,816 (1.6%)                         |
|                | <b>Other condition</b>               | 420 (24.0%)                       | 218 (34.3%)                       | 638 (26.7%)                         | 23,726 (7.3%)                       | 31,470 (9.3%)                         | 55,196 (8.3%)                         |
| <b>35-44 y</b> |                                      | <b>Men<br/>N=1,117<br/>(100%)</b> | <b>Women<br/>N=471<br/>(100%)</b> | <b>Total<br/>N=1,588<br/>(100%)</b> | <b>Men<br/>N=356,553<br/>(100%)</b> | <b>Women<br/>N=376,613<br/>(100%)</b> | <b>Total<br/>N=733,166<br/>(100%)</b> |
|                | <b>Deafness/partial hearing loss</b> | 83 (7.4%)                         | 44 (9.3%)                         | 127 (8.0%)                          | 8,442 (2.4%)                        | 7,067 (1.9%)                          | 15,509 (2.1%)                         |
|                | <b>Blindness/partial sight loss</b>  | 94 (8.4%)                         | 46 (9.8%)                         | 140 (8.8%)                          | 3,664 (1.0%)                        | 2,498 (0.7%)                          | 6,162 (0.8%)                          |
|                | <b>Intellectual disabilities</b>     | 304 (27.2%)                       | 146 (31.0%)                       | 450 (28.3%)                         | 1,905 (0.5%)                        | 1,504 (0.4%)                          | 3,409 (0.5%)                          |
|                | <b>Mental health condition</b>       | 377 (33.8%)                       | 187 (39.7%)                       | 564 (35.5%)                         | 22,156 (6.2%)                       | 27,844 (7.4%)                         | 50,000 (6.8%)                         |
|                | <b>Physical disability</b>           | 216 (19.3%)                       | 112 (23.8%)                       | 328 (20.7%)                         | 12,711 (3.6%)                       | 12,727 (3.4%)                         | 25,438 (3.5%)                         |
|                | <b>Other condition</b>               | 318 (28.5%)                       | 190 (40.3%)                       | 508 (32.0%)                         | 43,670 (12.2%)                      | 54,825 (14.6%)                        | 98,495 (13.4%)                        |
| <b>45-54 y</b> |                                      | <b>Men<br/>N=890<br/>(100%)</b>   | <b>Women<br/>N=377<br/>(100%)</b> | <b>Total<br/>N=1,267<br/>(100%)</b> | <b>Men<br/>N=383,627<br/>(100%)</b> | <b>Women<br/>N=401,862<br/>(100%)</b> | <b>Total<br/>N=785,489<br/>(100%)</b> |
|                | <b>Deafness/partial hearing loss</b> | 116 (13.0%)                       | 58 (15.4%)                        | 174 (13.7%)                         | 19,115 (5.0%)                       | 13,565 (3.4%)                         | 32,680 (4.2%)                         |
|                | <b>Blindness/partial sight loss</b>  | 113 (12.7%)                       | 46 (12.2%)                        | 159 (12.5%)                         | 6,753 (1.8%)                        | 4,554 (1.1%)                          | 11,307 (1.4%)                         |

|                |                                      |                                 |                                   |                                   |                                     |                                       |                                       |
|----------------|--------------------------------------|---------------------------------|-----------------------------------|-----------------------------------|-------------------------------------|---------------------------------------|---------------------------------------|
|                | <b>Intellectual disabilities</b>     | 268 (30.1%)                     | 133 (35.3%)                       | 401 (31.6%)                       | 2,188 (0.6%)                        | 1,712 (0.4%)                          | 3,900 (0.5%)                          |
|                | <b>Mental health condition</b>       | 316 (35.5%)                     | 140 (37.1%)                       | 456 (36.0%)                       | 23,060 (6.0%)                       | 29,734 (7.4%)                         | 52,794 (6.7%)                         |
|                | <b>Physical disability</b>           | 195 (21.9%)                     | 110 (29.2%)                       | 305 (24.1%)                       | 22,783 (5.9%)                       | 24,340 (6.1%)                         | 47,123 (6.0%)                         |
|                | <b>Other condition</b>               | 283 (31.8%)                     | 152 (40.3%)                       | 435 (34.3%)                       | 74,773 (19.5%)                      | 86,373 (21.5%)                        | 161,146 (20.5%)                       |
| <b>55-64 y</b> |                                      | <b>Men<br/>N=474<br/>(100%)</b> | <b>Women<br/>N=233<br/>(100%)</b> | <b>Total<br/>N=707<br/>(100%)</b> | <b>Men<br/>N=326,448<br/>(100%)</b> | <b>Women<br/>N=340,258<br/>(100%)</b> | <b>Total<br/>N=666,706<br/>(100%)</b> |
|                | <b>Deafness/partial hearing loss</b> | 123 (25.9%)                     | 35 (15.0%)                        | 158 (6.7%)                        | 35,743 (10.9%)                      | 21,889 (6.4%)                         | 57,632 (3.4%)                         |
|                | <b>Blindness/partial sight loss</b>  | 77 (16.2%)                      | 39 (16.7%)                        | 116 (6.5%)                        | 9,193 (2.8%)                        | 6,640 (2.0%)                          | 15,833 (1.2%)                         |
|                | <b>Intellectual disabilities</b>     | 158 (33.3%)                     | 98 (42.1%)                        | 256 (22.7%)                       | 1,381 (0.4%)                        | 1,226 (0.4%)                          | 2,607 (0.4%)                          |
|                | <b>Mental health condition</b>       | 175 (36.9%)                     | 87 (37.3%)                        | 262 (22.9%)                       | 16,848 (5.2%)                       | 18,483 (5.4%)                         | 35,331 (5.3%)                         |
|                | <b>Physical disability</b>           | 150 (31.6%)                     | 85 (36.5%)                        | 235 (15.1%)                       | 36,100 (11.1%)                      | 37,034 (10.9%)                        | 73,134 (4.7%)                         |
|                | <b>Other condition</b>               | 199 (42.0%)                     | 114 (48.9%)                       | 313 (24.6%)                       | 106,897 (32.7%)                     | 109,001 (32.0%)                       | 215,898 (16.4%)                       |
| <b>65+ y</b>   |                                      | <b>Men<br/>N=376<br/>(100%)</b> | <b>Women<br/>N=322<br/>(100%)</b> | <b>Total<br/>N=698<br/>(100%)</b> | <b>Men<br/>N=383,363<br/>(100%)</b> | <b>Women<br/>N=506,273<br/>(100%)</b> | <b>Total<br/>N=889,636<br/>(100%)</b> |
|                | <b>Deafness/partial hearing loss</b> | 167 (44.4%)                     | 151 (46.9%)                       | 318 (45.6%)                       | 111,353 (29.0%)                     | 114,323 (22.6%)                       | 225,676 (25.4%)                       |

|  |                                     |             |             |             |                 |                 |                 |
|--|-------------------------------------|-------------|-------------|-------------|-----------------|-----------------|-----------------|
|  | <b>Blindness/partial sight loss</b> | 101 (26.9%) | 111 (34.5%) | 212 (30.4%) | 30,359 (7.9%)   | 49,808 (9.8%)   | 80,167 (9.0%)   |
|  | <b>Intellectual disabilities</b>    | 133 (35.4%) | 111 (34.5%) | 244 (35.0%) | 1,033 (0.3%)    | 1,178 (0.2%)    | 2,211 (0.2%)    |
|  | <b>Mental health condition</b>      | 134 (35.6%) | 126 (39.1%) | 260 (37.2%) | 14,706 (3.8%)   | 26,095 (5.2%)   | 40,801 (4.6%)   |
|  | <b>Physical disability</b>          | 159 (42.3%) | 156 (48.4%) | 315 (45.1%) | 73,686 (19.2%)  | 109,046 (21.5%) | 182,732 (20.5%) |
|  | <b>Other condition</b>              | 182 (48.4%) | 190 (59.0%) | 372 (53.3%) | 158,024 (41.2%) | 208,206 (41.1%) | 366,230 (41.2%) |

**Table 3. Results of six regressions showing independent predictors of comorbid conditions in the whole adult population**

| Condition                               | Variable |                       | Odds ratio  | 95% confidence interval |
|-----------------------------------------|----------|-----------------------|-------------|-------------------------|
| <b>Deafness or partial hearing loss</b> | Autism   | No autism (reference) | -           |                         |
|                                         |          | Autism                | 3.320       | 3.075-3.585             |
|                                         | Age      | 25-34 (reference)     | -           |                         |
|                                         |          | 35-44                 | 1.768       | 1.721-1.817             |
|                                         |          | 45-54                 | 3.550       | 3.464-3.638             |
|                                         |          | 55-64                 | 7.742       | 7.563-7.926             |
|                                         |          | 65+                   | 28.621      | 27.987-29.269           |
|                                         | Gender   | Male (reference)      | -           |                         |
| Female                                  |          | .683                  | .678-.688   |                         |
| Constant                                |          |                       | .015        |                         |
| <b>Blindness or partial sight loss</b>  | Autism   | No autism (reference) | -           |                         |
|                                         |          | Autism                | 8.514       | 7.861-9.220             |
|                                         | Age      | 25-34 (reference)     | -           |                         |
|                                         |          | 35-44                 | 1.360       | 1.308-1.414             |
|                                         |          | 45-54                 | 2.335       | 2.254-2.419             |
|                                         |          | 55-64                 | 3.882       | 3.752-4.016             |
|                                         |          | 65+                   | 15.769      | 15.287-16.267           |
|                                         | Gender   | Male (reference)      | -           |                         |
| Female                                  |          | 1.018                 | 1.006-1.030 |                         |
| Constant                                |          |                       | .006        |                         |
| <b>Intellectual disabilities</b>        | Autism   | No autism (reference) | -           |                         |
|                                         |          | Autism                | 94.571      | 89.409-100.032          |
|                                         | Age      | 25-34 (reference)     | -           |                         |
|                                         |          | 35-44                 | 1.101       | 1.050-1.154             |
|                                         |          | 45-54                 | 1.187       | 1.134-1.243             |
|                                         |          | 55-64*                | .958        | .910-1.008              |
|                                         |          | 65+                   | .631        | .598-.665               |
|                                         | Gender   | Male (reference)      | -           |                         |
| Female                                  |          | .812                  | .788-.838   |                         |
| Constant                                |          |                       | .005        |                         |
| <b>Mental health condition</b>          | Autism   | No autism (reference) | -           |                         |
|                                         |          | Autism                | 8.595       | 8.163-9.050             |
|                                         | Age      | 25-34 (reference)     | -           |                         |
|                                         |          | 35-44                 | 1.404       | 1.384-1.424             |
|                                         |          | 45-54                 | 1.383       | 1.364-1.403             |
|                                         |          | 55-64                 | 1.076       | 1.060-1.093             |
| 65+                                     | .913     | .899-.926             |             |                         |

|                            |          |                       |        |               |
|----------------------------|----------|-----------------------|--------|---------------|
|                            | Gender   | Male (reference)      | -      |               |
|                            |          | Female                | 1.247  | 1.236-1.258   |
|                            | Constant |                       | .046   |               |
| <b>Physical disability</b> | Autism   | No autism (reference) | -      |               |
|                            |          | Autism                | 6.210  | 5.841-6.603   |
|                            | Age      | 25-34 (reference)     | -      |               |
|                            |          | 35-44                 | 2.138  | 2.091-2.186   |
|                            |          | 45-54                 | 3.786  | 3.708-3.866   |
|                            |          | 55-64                 | 7.311  | 7.164-7.460   |
|                            |          | 65+                   | 15.288 | 14.994-15.587 |
|                            | Gender   | Male (reference)      | -      |               |
|                            |          | Female                | 1.064  | 1.056-1.072   |
|                            | Constant |                       | .016   |               |
| <b>Other condition</b>     | Autism   | No autism (reference) | -      |               |
|                            |          | Autism                | 2.640  | 2.502-2.786   |
|                            | Age      | 25-34 (reference)     | -      |               |
|                            |          | 35-44                 | 1.709  | 1.690-1.728   |
|                            |          | 45-54                 | 2.839  | 2.810-2.868   |
|                            |          | 55-64                 | 5.269  | 5.217-5.323   |
|                            |          | 65+                   | 7.671  | 7.597-7.745   |
|                            | Gender   | Male (reference)      | -      |               |
|                            |          | Female                | 1.068  | 1.063-1.074   |
|                            | Constant |                       | .088   |               |

**Table 4. Results of six regressions showing independent predictors of comorbid conditions in the adult population with autism**

| Condition                               | Variable |                   | Odds ratio | 95% confidence interval |
|-----------------------------------------|----------|-------------------|------------|-------------------------|
| <b>Deafness or partial hearing loss</b> | Age      | 25-34 (reference) | -          |                         |
|                                         |          | 35-44             | 1.189      | .934-1.514              |
|                                         |          | 45-54             | 2.178      | 1.738-2.731             |
|                                         |          | 55-64             | 3.920      | 3.088-4.975             |
|                                         |          | 65+               | 11.179     | 8.972-13.929            |
|                                         | Gender   | Male (reference)  | -          |                         |
|                                         |          | Female            | 1.169      | 1.001-1.365             |
| Constant                                |          | .070              |            |                         |
| <b>Blindness or partial sight loss</b>  | Age      | 25-34 (reference) | -          |                         |
|                                         |          | 35-44             | 1.179      | .936-1.485              |
|                                         |          | 45-54             | 1.750      | 1.397-2.192             |
|                                         |          | 55-64             | 2.378      | 1.851-3.056             |
|                                         |          | 65+               | 5.148      | 4.117-6.438             |
|                                         | Gender   | Male (reference)  | -          |                         |
|                                         |          | Female            | 1.232      | 1.051-1.443             |
| Constant                                |          | .077              |            |                         |
| <b>Intellectual disabilities</b>        | Age      | 25-34 (reference) | -          |                         |
|                                         |          | 35-44             | 1.163      | 1.008-1.343             |
|                                         |          | 45-54             | 1.363      | 1.172-1.584             |
|                                         |          | 55-64             | 1.656      | 1.384-1.981             |
|                                         |          | 65+               | 1.505      | 1.254-1.807             |
|                                         | Gender   | Male (reference)  | -          |                         |
|                                         |          | Female            | 1.354      | 1.209-1.516             |
| Constant                                |          | .309              |            |                         |
| <b>Mental health condition</b>          | Age      | 25-34 (reference) | -          |                         |
|                                         |          | 35-44             | 1.455      | 1.269-1.668             |
|                                         |          | 45-54             | 1.485      | 1.284-1.719             |
|                                         |          | 55-64             | 1.548      | 1.297-1.849             |
|                                         |          | 65+               | 1.531      | 1.280-1.832             |
|                                         | Gender   | Male (reference)  | -          |                         |
|                                         |          | Female            | 1.155      | 1.034-1.291             |
| Constant                                |          | .362              |            |                         |
| <b>Physical disability</b>              | Age      | 25-34 (reference) | -          |                         |
|                                         |          | 35-44             | 1.220      | 1.038-1.434             |
|                                         |          | 45-54             | 1.487      | 1.258-1.758             |
|                                         |          | 55-64             | 2.312      | 1.913-2.795             |

|                        |          |                   |       |             |
|------------------------|----------|-------------------|-------|-------------|
|                        |          | 65+               | 3.634 | 3.022-4.370 |
|                        | Gender   | Male (reference)  | -     |             |
|                        |          | Female            | 1.504 | 1.333-1.697 |
|                        | Constant |                   | .187  |             |
| <b>Other condition</b> | Age      | 25-34 (reference) | -     |             |
|                        |          | 35-44             | 1.276 | 1.109-1.467 |
|                        |          | 45-54             | 1.419 | 1.224-1.645 |
|                        |          | 55-64             | 2.134 | 1.792-2.542 |
|                        |          | 65+               | 2.901 | 2.433-3.459 |
|                        | Gender   | Male (reference)  | -     |             |
|                        |          | Female            | 1.563 | 1.400-1.745 |
| Constant               |          | .321              |       |             |

**STROBE 2007 (v4) Statement—Checklist of items that should be included in reports of *cross-sectional studies***

| Section/Topic             | Item # | Recommendation                                                                                                                                                                       | Reported on page #                            |
|---------------------------|--------|--------------------------------------------------------------------------------------------------------------------------------------------------------------------------------------|-----------------------------------------------|
| Title and abstract        | 1      | (a) Indicate the study’s design with a commonly used term in the title or the abstract                                                                                               | Page 1                                        |
|                           |        | (b) Provide in the abstract an informative and balanced summary of what was done and what was found                                                                                  | Page 2                                        |
| <b>Introduction</b>       |        |                                                                                                                                                                                      |                                               |
| Background/rationale      | 2      | Explain the scientific background and rationale for the investigation being reported                                                                                                 | Page 4-5<br>Section: Introduction             |
| Objectives                | 3      | State specific objectives, including any prespecified hypotheses                                                                                                                     | Page 5<br>Section: Introduction               |
| <b>Methods</b>            |        |                                                                                                                                                                                      |                                               |
| Study design              | 4      | Present key elements of study design early in the paper                                                                                                                              | Page 5-6<br>Section: Methods/Data source      |
| Setting                   | 5      | Describe the setting, locations, and relevant dates, including periods of recruitment, exposure, follow-up, and data collection                                                      | Page 5-6<br>Section: Methods/Data source      |
| Participants              | 6      | (a) Give the eligibility criteria, and the sources and methods of selection of participants                                                                                          | Page 6-8<br>Section: Methods/Census variables |
| Variables                 | 7      | Clearly define all outcomes, exposures, predictors, potential confounders, and effect modifiers. Give diagnostic criteria, if applicable                                             | Page 6-8<br>Section: Methods/Census variables |
| Data sources/ measurement | 8*     | For each variable of interest, give sources of data and details of methods of assessment (measurement). Describe comparability of assessment methods if there is more than one group | Page 6-8<br>Section: Methods/Census variables |
| Bias                      | 9      | Describe any efforts to address potential sources of bias                                                                                                                            | Page 5-8<br>Section: Methods                  |
| Study size                | 10     | Explain how the study size was arrived at                                                                                                                                            | Page 5-6<br>Section: Methods/Data             |



|                        |     |                                                                                                                                                                                                   |                                                                              |
|------------------------|-----|---------------------------------------------------------------------------------------------------------------------------------------------------------------------------------------------------|------------------------------------------------------------------------------|
|                        |     |                                                                                                                                                                                                   | source                                                                       |
| Quantitative variables | 11  | Explain how quantitative variables were handled in the analyses. If applicable, describe which groupings were chosen and why                                                                      | Page 8<br>Section: Methods/Data analysis                                     |
| Statistical methods    | 12  | (a) Describe all statistical methods, including those used to control for confounding                                                                                                             | Page 8<br>Section: Methods/Data analysis                                     |
|                        |     | (b) Describe any methods used to examine subgroups and interactions                                                                                                                               | Page 8<br>Section: Methods/Data analysis                                     |
|                        |     | (c) Explain how missing data were addressed                                                                                                                                                       | Page 5-6<br>Section: Methods/Data source                                     |
|                        |     | (d) If applicable, describe analytical methods taking account of sampling strategy                                                                                                                | N/A                                                                          |
|                        |     | (e) Describe any sensitivity analyses                                                                                                                                                             | N/A                                                                          |
| <b>Results</b>         |     |                                                                                                                                                                                                   |                                                                              |
| Participants           | 13* | (a) Report numbers of individuals at each stage of study—eg numbers potentially eligible, examined for eligibility, confirmed eligible, included in the study, completing follow-up, and analysed | Page 9<br>Section:<br>Results/Participant characteristics                    |
|                        |     | (b) Give reasons for non-participation at each stage                                                                                                                                              | N/A                                                                          |
|                        |     | (c) Consider use of a flow diagram                                                                                                                                                                | N/A                                                                          |
| Descriptive data       | 14* | (a) Give characteristics of study participants (eg demographic, clinical, social) and information on exposures and potential confounders                                                          | Page 9<br>Section:<br>Results/Participant characteristics<br>Page 16 Table 1 |
|                        |     | (b) Indicate number of participants with missing data for each variable of interest                                                                                                               | Page 5-6<br>Section: Methods/Data source                                     |
| Outcome data           | 15* | Report numbers of outcome events or summary measures                                                                                                                                              | N/A                                                                          |

|    |                          |    |                                                                                                                                                                                                                |                                                                                                        |
|----|--------------------------|----|----------------------------------------------------------------------------------------------------------------------------------------------------------------------------------------------------------------|--------------------------------------------------------------------------------------------------------|
| 1  | Main results             | 16 | (a) Give unadjusted estimates and, if applicable, confounder-adjusted estimates and their precision (e.g., 95% confidence interval). Make clear which confounders were adjusted for and why they were included | Pages 9-10<br>Section:<br>results/Prevalence of<br>reported comorbidities<br>Pages 17-24 Tables 2-4    |
| 2  |                          |    | (b) Report category boundaries when continuous variables were categorized                                                                                                                                      | Page 8<br>Section: Methods/data<br>analysis<br>Pages 16-24 Tables 1-4                                  |
| 3  |                          |    | (c) If relevant, consider translating estimates of relative risk into absolute risk for a meaningful time period                                                                                               | N/A                                                                                                    |
| 4  | Other analyses           | 17 | Report other analyses done—eg analyses of subgroups and interactions, and sensitivity analyses                                                                                                                 | N/A                                                                                                    |
| 5  | <b>Discussion</b>        |    |                                                                                                                                                                                                                |                                                                                                        |
| 6  | Key results              | 18 | Summarise key results with reference to study objectives                                                                                                                                                       | Page 10-11<br>Section: Discussion/<br>Principal findings and<br>comparison with existing<br>literature |
| 7  | Limitations              | 19 | Discuss limitations of the study, taking into account sources of potential bias or imprecision. Discuss both direction and magnitude of any potential bias                                                     | Page 12-13<br>Section: Strengths and<br>limitations                                                    |
| 8  | Interpretation           | 20 | Give a cautious overall interpretation of results considering objectives, limitations, multiplicity of analyses, results from similar studies, and other relevant evidence                                     | Page 10-11<br>Section: Discussion/<br>Principal findings and<br>comparison with existing<br>literature |
| 9  | Generalisability         | 21 | Discuss the generalisability (external validity) of the study results                                                                                                                                          | Page 13<br>Section: Implications for<br>clinicians                                                     |
| 10 | <b>Other information</b> |    |                                                                                                                                                                                                                |                                                                                                        |
| 11 | Funding                  | 22 | Give the source of funding and the role of the funders for the present study and, if applicable, for the original study on which the present article is based                                                  | Page 13-14<br>Section: Funding                                                                         |

1  
2  
3  
4  
5 \*Give information separately for exposed and unexposed groups.  
6

7 **Note:** An Explanation and Elaboration article discusses each checklist item and gives methodological background and published examples of transparent reporting. The STROBE  
8 checklist is best used in conjunction with this article (freely available on the Web sites of PLoS Medicine at <http://www.plosmedicine.org/>, Annals of Internal Medicine at  
9 <http://www.annals.org/>, and Epidemiology at <http://www.epidem.com/>). Information on the STROBE Initiative is available at [www.strobe-statement.org](http://www.strobe-statement.org).  
10  
11  
12  
13  
14  
15  
16  
17  
18  
19  
20  
21  
22  
23  
24  
25  
26  
27  
28  
29  
30  
31  
32  
33  
34  
35  
36  
37  
38  
39  
40  
41  
42  
43  
44  
45  
46  
47

For peer review only
